# Supplementary material
Source: publisher site journal article supplement (https://www.spandidos-publications.com/2734/downloadSupplementary)
Supplement: Supplementary file 1 [file downloadSupplementary]

## Sheet: Original Data
project_id	case_id	submitter_id	cause_of_death	gender	year_of_birth	race	days_to_birth	vital_status	days_to_death	ethnicity	year_of_death	ann_arbor_b_symptoms	year_of_diagnosis	classification_of_tumor	last_known_disease_status	method_of_diagnosis	laterality	residual_disease	primary_diagnosis	tumor_stage	age_at_diagnosis	Distant metastasis	hpv_positive_type	morphology	ann_arbor_clinical_stage	new_event_anatomic_site	days_to_last_known_disease_status	perineural_invasion_present	ajcc_clinical_n	prior_treatment	ajcc_clinical_m	colon_polyps_history	ajcc_pathologic_m	ajcc_pathologic_n	tumor_largest_dimension_diameter	days_to_last_follow_up	ann_arbor_pathologic_stage	days_to_recurrence	tumor_grade	figo_stage	lymphatic_invasion_present	tissue_or_organ_of_origin	progression_or_recurrence	ajcc_clinical_t	hpv_status	prior_malignancy	ajcc_staging_system_edition	vascular_invasion_present	new_event_type
TCGA-KIRC	2b1dea0a-6d55-4fdd-9c1c-0d9fbe03bd78	TCGA-3Z-A93Z	--	male	1944	black or african american	-25205	alive	--	not hispanic or latino	--	--	--	not reported	not reported	--	--	--	Clear cell adenocarcinoma, NOS	stage i	25205	M0	--	8310-03-01	--	--	--	--	--	--	--	--	--	--	--	385	--	--	not reported	--	--	Kidney, NOS	not reported	--	--	not reported	--	--	--
TCGA-KIRC	d3b47e53-6f40-4fc8-b5a4-cbe548a770a9	TCGA-6D-AA2E	--	female	1945	black or african american	-25043	alive	--	not hispanic or latino	--	--	--	not reported	not reported	--	--	--	Clear cell adenocarcinoma, NOS	stage i	25043	MX	--	8310-03-01	--	--	--	--	--	--	--	--	--	--	--	362	--	--	not reported	--	--	Kidney, NOS	not reported	--	--	not reported	--	--	--
TCGA-KIRC	7ac1d6c6-9ade-49af-8794-10b5b96b2b05	TCGA-A3-3307	--	male	1939	not reported	-24315	alive	--	not reported	--	--	--	not reported	not reported	--	--	--	Clear cell adenocarcinoma, NOS	stage iii	24315	M0	--	8310-03-01	--	--	--	--	--	--	--	--	--	--	--	1436	--	--	not reported	--	--	Kidney, NOS	not reported	--	--	not reported	--	--	--
TCGA-KIRC	0c139772-e303-45d1-b0c7-438fa1db105e	TCGA-A3-3311	--	male	1948	not reported	-21183	dead	1191	not reported	2008	--	--	not reported	not reported	--	--	--	Clear cell adenocarcinoma, NOS	stage i	21183	M0	--	8310-03-01	--	--	--	--	--	--	--	--	--	--	--	--	--	--	not reported	--	--	Kidney, NOS	not reported	--	--	not reported	--	--	--
TCGA-KIRC	12c4c4f1-5880-4bf9-9945-80bf45415de6	TCGA-A3-3316	--	male	1948	white	-20931	alive	--	not reported	--	--	--	not reported	not reported	--	--	--	Clear cell adenocarcinoma, NOS	stage ii	20931	M0	--	8310-03-01	--	--	--	--	--	--	--	--	--	--	--	1493	--	--	not reported	--	--	Kidney, NOS	not reported	--	--	not reported	--	--	--
TCGA-KIRC	8ee720b5-6f3a-4921-85ab-70e75c0835b0	TCGA-A3-3317	--	male	1938	not reported	-24803	alive	--	not reported	--	--	--	not reported	not reported	--	--	--	Clear cell adenocarcinoma, NOS	stage ii	24803	M0	--	8310-03-01	--	--	--	--	--	--	--	--	--	--	--	1491	--	--	not reported	--	--	Kidney, NOS	not reported	--	--	not reported	--	--	--
TCGA-KIRC	50f29fc7-c111-4101-b970-b1e1dd3388cf	TCGA-A3-3320	--	female	1953	white	-19138	alive	--	not reported	--	--	--	not reported	not reported	--	--	--	Clear cell adenocarcinoma, NOS	stage i	19138	M0	--	8310-03-01	--	--	--	--	--	--	--	--	--	--	--	1508	--	--	not reported	--	--	Kidney, NOS	not reported	--	--	not reported	--	--	--
TCGA-KIRC	9868ae73-3459-4aa6-b71a-39953cdbbe1a	TCGA-A3-3325	--	male	1954	white	-19126	dead	1170	not hispanic or latino	--	--	--	not reported	not reported	--	--	--	Clear cell adenocarcinoma, NOS	stage i	19126	M0	--	8310-03-01	--	--	--	--	--	--	--	--	--	--	--	751	--	--	not reported	--	--	Kidney, NOS	not reported	--	--	not reported	--	--	--
TCGA-KIRC	8d02978a-10cb-4bbf-8980-78aebe70bcd1	TCGA-A3-3328	--	male	1928	white	-29168	alive	--	not hispanic or latino	--	--	--	not reported	not reported	--	--	--	Clear cell adenocarcinoma, NOS	stage i	29168	M0	--	8310-03-01	--	--	--	--	--	--	--	--	--	--	--	1385	--	--	not reported	--	--	Kidney, NOS	not reported	--	--	not reported	--	--	--
TCGA-KIRC	21eea125-1298-42d3-a50c-57d596e0420d	TCGA-A3-3329	--	male	1932	white	-27650	alive	--	not hispanic or latino	--	--	--	not reported	not reported	--	--	--	Clear cell adenocarcinoma, NOS	stage i	27650	M0	--	8310-03-01	--	--	--	--	--	--	--	--	--	--	--	1624	--	--	not reported	--	--	Kidney, NOS	not reported	--	--	not reported	--	--	--
TCGA-KIRC	897f85ec-7e14-426a-a532-eed01ccc90f1	TCGA-A3-3346	--	male	1937	white	-25118	dead	137	not reported	2005	--	--	not reported	not reported	--	--	--	Clear cell adenocarcinoma, NOS	stage i	25118	M0	--	8310-03-01	--	--	--	--	--	--	--	--	--	--	--	--	--	--	not reported	--	--	Kidney, NOS	not reported	--	--	not reported	--	--	--
TCGA-KIRC	3372a7d2-79cb-4cf0-9a7e-fe1a6b205daa	TCGA-A3-3347	--	female	1929	white	-27966	dead	1610	not hispanic or latino	--	--	--	not reported	not reported	--	--	--	Clear cell adenocarcinoma, NOS	stage iii	27966	M0	--	8310-03-01	--	--	--	--	--	--	--	--	--	--	--	1610	--	--	not reported	--	--	Kidney, NOS	not reported	--	--	not reported	--	--	--
TCGA-KIRC	ee7011e7-f692-410a-ba35-efe1ec75cf8e	TCGA-A3-3351	--	male	1965	white	-15562	alive	--	hispanic or latino	--	--	--	not reported	not reported	--	--	--	Clear cell adenocarcinoma, NOS	stage ii	15562	M0	--	8310-03-01	--	--	--	--	--	--	--	--	--	--	--	910	--	--	not reported	--	--	Kidney, NOS	not reported	--	--	not reported	--	--	--
TCGA-KIRC	2304b8f8-4cb4-46c5-a88e-c78d97b06d6b	TCGA-A3-3352	--	male	1931	white	--	dead	561	not hispanic or latino	2006	--	--	not reported	not reported	--	--	--	Clear cell adenocarcinoma, NOS	stage iii	--	M0	--	8310-03-01	--	--	--	--	--	--	--	--	--	--	--	--	--	--	not reported	--	--	Kidney, NOS	not reported	--	--	not reported	--	--	--
TCGA-KIRC	4d856b5d-a59b-45f2-a9b2-4d43ec8a20e4	TCGA-A3-3357	--	male	1943	white	-22825	alive	--	not hispanic or latino	--	--	--	not reported	not reported	--	--	--	Clear cell adenocarcinoma, NOS	stage ii	22825	M0	--	8310-03-01	--	--	--	--	--	--	--	--	--	--	--	2688	--	--	not reported	--	--	Kidney, NOS	not reported	--	--	not reported	--	--	--
TCGA-KIRC	8a575e00-5dc5-416d-a8f5-2cdfb8e62c31	TCGA-A3-3358	--	female	1948	white	-21087	alive	--	not hispanic or latino	--	--	--	not reported	not reported	--	--	--	Clear cell adenocarcinoma, NOS	stage i	21087	M0	--	8310-03-01	--	--	--	--	--	--	--	--	--	--	--	1307	--	--	not reported	--	--	Kidney, NOS	not reported	--	--	not reported	--	--	--
TCGA-KIRC	e4cc8898-d1d8-4f6d-b01c-04cd30f0cd8f	TCGA-A3-3359	--	female	1923	white	-30269	alive	--	not hispanic or latino	--	--	--	not reported	not reported	--	--	--	Clear cell adenocarcinoma, NOS	stage i	30269	M0	--	8310-03-01	--	--	--	--	--	--	--	--	--	--	--	2504	--	--	not reported	--	--	Kidney, NOS	not reported	--	--	not reported	--	--	--
TCGA-KIRC	c7e9ba09-0826-466c-8555-6595de31ed31	TCGA-A3-3362	--	female	1945	white	-21988	alive	--	not hispanic or latino	--	--	--	not reported	not reported	--	--	--	Clear cell adenocarcinoma, NOS	stage i	21988	M0	--	8310-03-01	--	--	--	--	--	--	--	--	--	--	--	1559	--	--	not reported	--	--	Kidney, NOS	not reported	--	--	not reported	--	--	--
TCGA-KIRC	659294b9-ded9-498a-bc00-c1d4d456aa4a	TCGA-A3-3363	--	male	1956	asian	-18596	alive	--	not reported	--	--	--	not reported	not reported	--	--	--	Clear cell adenocarcinoma, NOS	stage ii	18596	M0	--	8310-03-01	--	--	--	--	--	--	--	--	--	--	--	319	--	--	not reported	--	--	Kidney, NOS	not reported	--	--	not reported	--	--	--
TCGA-KIRC	136c95cd-febd-43f0-af35-125d3321a145	TCGA-A3-3365	--	male	1960	white	-16915	alive	--	not reported	--	--	--	not reported	not reported	--	--	--	Clear cell adenocarcinoma, NOS	stage i	16915	M0	--	8310-03-01	--	--	--	--	--	--	--	--	--	--	--	873	--	--	not reported	--	--	Kidney, NOS	not reported	--	--	not reported	--	--	--
TCGA-KIRC	69fb3eff-a32c-48e1-aab8-645ef31d163a	TCGA-A3-3367	--	male	1934	white	-26489	alive	--	not hispanic or latino	--	--	--	not reported	not reported	--	--	--	Clear cell adenocarcinoma, NOS	stage i	26489	M0	--	8310-03-01	--	--	--	--	--	--	--	--	--	--	--	2270	--	--	not reported	--	--	Kidney, NOS	not reported	--	--	not reported	--	--	--
TCGA-KIRC	9f632fc3-2241-469a-a14a-cd537350155f	TCGA-A3-3370	--	female	1958	white	-17621	alive	--	not hispanic or latino	--	--	--	not reported	not reported	--	--	--	Clear cell adenocarcinoma, NOS	stage i	17621	M0	--	8310-03-01	--	--	--	--	--	--	--	--	--	--	--	2274	--	--	not reported	--	--	Kidney, NOS	not reported	--	--	not reported	--	--	--
TCGA-KIRC	11ab53c8-6366-4bc9-b60d-23e6ed2d1cae	TCGA-A3-3372	--	male	1943	white	-23528	alive	--	not reported	--	--	--	not reported	not reported	--	--	--	Clear cell adenocarcinoma, NOS	stage iii	23528	M0	--	8310-03-01	--	--	--	--	--	--	--	--	--	--	--	735	--	--	not reported	--	--	Kidney, NOS	not reported	--	--	not reported	--	--	--
TCGA-KIRC	46240f32-116b-470c-9846-3616a6db4f2e	TCGA-A3-3376	--	male	1955	black or african american	-18954	dead	1696	not hispanic or latino	--	--	--	not reported	not reported	--	--	--	Clear cell adenocarcinoma, NOS	stage i	18954	M0	--	8310-03-01	--	--	--	--	--	--	--	--	--	--	--	1070	--	--	not reported	--	--	Kidney, NOS	not reported	--	--	not reported	--	--	--
TCGA-KIRC	798d51ff-182e-406c-8885-8a198d9959d1	TCGA-A3-3378	--	male	1946	white	-22090	alive	--	not hispanic or latino	--	--	--	not reported	not reported	--	--	--	Clear cell adenocarcinoma, NOS	stage i	22090	M0	--	8310-03-01	--	--	--	--	--	--	--	--	--	--	--	630	--	--	not reported	--	--	Kidney, NOS	not reported	--	--	not reported	--	--	--
TCGA-KIRC	8ed08632-b5b3-4be3-bd71-999456fa2d23	TCGA-A3-3380	--	male	1953	not reported	-19828	alive	--	hispanic or latino	--	--	--	not reported	not reported	--	--	--	Clear cell adenocarcinoma, NOS	stage i	19828	M0	--	8310-03-01	--	--	--	--	--	--	--	--	--	--	--	567	--	--	not reported	--	--	Kidney, NOS	not reported	--	--	not reported	--	--	--
TCGA-KIRC	e1663694-17dd-4b01-b613-2516e022dfb7	TCGA-A3-3382	--	male	1938	white	-25207	alive	--	not reported	--	--	--	not reported	not reported	--	--	--	Clear cell adenocarcinoma, NOS	stage i	25207	M0	--	8310-03-01	--	--	--	--	--	--	--	--	--	--	--	574	--	--	not reported	--	--	Kidney, NOS	not reported	--	--	not reported	--	--	--
TCGA-KIRC	46c87ae0-c123-4bdc-8a79-d375d8a7e7a3	TCGA-A3-3383	--	male	1954	white	-19324	alive	--	not reported	--	--	--	not reported	not reported	--	--	--	Clear cell adenocarcinoma, NOS	stage i	19324	M0	--	8310-03-01	--	--	--	--	--	--	--	--	--	--	--	861	--	--	not reported	--	--	Kidney, NOS	not reported	--	--	not reported	--	--	--
TCGA-KIRC	4c44f4a4-1529-4897-9f69-c8e6c705f905	TCGA-A3-3385	--	female	1961	white	-17114	alive	--	not hispanic or latino	--	--	--	not reported	not reported	--	--	--	Clear cell adenocarcinoma, NOS	stage i	17114	M0	--	8310-03-01	--	--	--	--	--	--	--	--	--	--	--	1993	--	--	not reported	--	--	Kidney, NOS	not reported	--	--	not reported	--	--	--
TCGA-KIRC	9dc7812b-c7a2-4de4-bf6d-4c7261384a62	TCGA-A3-3387	--	male	1957	white	-17920	alive	--	not hispanic or latino	--	--	--	not reported	not reported	--	--	--	Clear cell adenocarcinoma, NOS	stage i	17920	M0	--	8310-03-01	--	--	--	--	--	--	--	--	--	--	--	617	--	--	not reported	--	--	Kidney, NOS	not reported	--	--	not reported	--	--	--
TCGA-KIRC	2953131e-9c34-4fa2-8af4-2c8d66ea2821	TCGA-A3-A6NI	--	male	1964	black or african american	-17190	alive	--	not hispanic or latino	--	--	--	not reported	not reported	--	--	--	Renal cell carcinoma, NOS	stage i	17190	MX	--	8312-03-01	--	--	--	--	--	--	--	--	--	--	--	1018	--	--	not reported	--	--	Kidney, NOS	not reported	--	--	not reported	--	--	--
TCGA-KIRC	96c38b74-c22b-4001-bfd0-a37eda1fbaed	TCGA-A3-A6NJ	--	female	1955	black or african american	-20918	alive	--	not hispanic or latino	--	--	--	not reported	not reported	--	--	--	Renal cell carcinoma, NOS	stage i	20918	MX	--	8312-03-01	--	--	--	--	--	--	--	--	--	--	--	468	--	--	not reported	--	--	Kidney, NOS	not reported	--	--	not reported	--	--	--
TCGA-KIRC	52db2d93-fcc6-4f80-9668-a0a6ea450738	TCGA-A3-A6NL	--	female	1963	black or african american	-17952	alive	--	not hispanic or latino	--	--	--	not reported	not reported	--	--	--	Renal cell carcinoma, NOS	stage i	17952	MX	--	8312-03-01	--	--	--	--	--	--	--	--	--	--	--	689	--	--	not reported	--	--	Kidney, NOS	not reported	--	--	not reported	--	--	--
TCGA-KIRC	060b2104-a015-400e-86c6-6febfb02bbd3	TCGA-A3-A6NN	--	male	1934	black or african american	-28689	alive	--	not hispanic or latino	--	--	--	not reported	not reported	--	--	--	Renal cell carcinoma, NOS	stage i	28689	MX	--	8312-03-01	--	--	--	--	--	--	--	--	--	--	--	3	--	--	not reported	--	--	Kidney, NOS	not reported	--	--	not reported	--	--	--
TCGA-KIRC	b39d6675-9378-4652-8a28-9b52b8ca88ce	TCGA-A3-A8CQ	--	female	1952	black or african american	-21572	alive	--	not hispanic or latino	--	--	--	not reported	not reported	--	--	--	Clear cell adenocarcinoma, NOS	stage i	21572	MX	--	8310-03-01	--	--	--	--	--	--	--	--	--	--	--	3	--	--	not reported	--	--	Kidney, NOS	not reported	--	--	not reported	--	--	--
TCGA-KIRC	a42103aa-0f25-4939-9f9d-9ec11a5c8cca	TCGA-A3-A8OW	--	male	1974	black or african american	-13546	alive	--	not hispanic or latino	--	--	--	not reported	not reported	--	--	--	Clear cell adenocarcinoma, NOS	stage iii	13546	MX	--	8310-03-01	--	--	--	--	--	--	--	--	--	--	--	323	--	--	not reported	--	--	Kidney, NOS	not reported	--	--	not reported	--	--	--
TCGA-KIRC	c5265ca6-2cb5-406d-a635-c4c783561107	TCGA-AK-3426	--	male	1967	white	-13770	dead	885	not hispanic or latino	2006	--	--	not reported	not reported	--	--	--	Clear cell adenocarcinoma, NOS	stage iii	13770	M0	--	8310-03-01	--	--	--	--	--	--	--	--	--	--	--	--	--	--	not reported	--	--	Kidney, NOS	not reported	--	--	not reported	--	--	--
TCGA-KIRC	b3a6acab-00ad-48b7-94c2-bd56b461b48f	TCGA-AK-3429	--	female	1950	white	-19849	alive	--	not hispanic or latino	--	--	--	not reported	not reported	--	--	--	Clear cell adenocarcinoma, NOS	stage ii	19849	M0	--	8310-03-01	--	--	--	--	--	--	--	--	--	--	--	3328	--	--	not reported	--	--	Kidney, NOS	not reported	--	--	not reported	--	--	--
TCGA-KIRC	17d053f2-8760-4f8e-9d25-64508e7f3857	TCGA-AK-3434	--	male	1932	white	-26490	alive	--	not hispanic or latino	--	--	--	not reported	not reported	--	--	--	Clear cell adenocarcinoma, NOS	stage i	26490	M0	--	8310-03-01	--	--	--	--	--	--	--	--	--	--	--	2087	--	--	not reported	--	--	Kidney, NOS	not reported	--	--	not reported	--	--	--
TCGA-KIRC	d7155ce6-e6b2-4c1f-8233-85f0d63e8e11	TCGA-AK-3443	--	male	1961	white	-16578	alive	--	not hispanic or latino	--	--	--	not reported	not reported	--	--	--	Clear cell adenocarcinoma, NOS	stage ii	16578	M0	--	8310-03-01	--	--	--	--	--	--	--	--	--	--	--	1423	--	--	not reported	--	--	Kidney, NOS	not reported	--	--	not reported	--	--	--
TCGA-KIRC	c0171d4e-9970-44f4-8502-f31f0e145643	TCGA-AK-3445	--	male	1937	white	-25494	alive	--	not hispanic or latino	--	--	--	not reported	not reported	--	--	--	Clear cell adenocarcinoma, NOS	stage iii	25494	M0	--	8310-03-01	--	--	--	--	--	--	--	--	--	--	--	2392	--	--	not reported	--	--	Kidney, NOS	not reported	--	--	not reported	--	--	--
TCGA-KIRC	0709749f-a30a-4fdd-a409-d12be09a5899	TCGA-AK-3450	--	female	1921	white	-31364	alive	--	not hispanic or latino	--	--	--	not reported	not reported	--	--	--	Clear cell adenocarcinoma, NOS	stage i	31364	M0	--	8310-03-01	--	--	--	--	--	--	--	--	--	--	--	1779	--	--	not reported	--	--	Kidney, NOS	not reported	--	--	not reported	--	--	--
TCGA-KIRC	fd5728e0-e495-45f5-aac8-c0856510c8aa	TCGA-AK-3453	--	female	1948	white	-21271	alive	--	not hispanic or latino	--	--	--	not reported	not reported	--	--	--	Clear cell adenocarcinoma, NOS	stage ii	21271	M0	--	8310-03-01	--	--	--	--	--	--	--	--	--	--	--	2531	--	--	not reported	--	--	Kidney, NOS	not reported	--	--	not reported	--	--	--
TCGA-KIRC	2ed3296a-5b10-40d8-8af4-90dc031657cd	TCGA-AK-3455	--	female	1936	white	-26221	dead	683	not hispanic or latino	2008	--	--	not reported	not reported	--	--	--	Clear cell adenocarcinoma, NOS	stage iii	26221	M0	--	8310-03-01	--	--	--	--	--	--	--	--	--	--	--	--	--	--	not reported	--	--	Kidney, NOS	not reported	--	--	not reported	--	--	--
TCGA-KIRC	5cf9d9fe-2823-4577-a150-27b970f38a5d	TCGA-AK-3460	--	male	1949	white	-21281	alive	--	not hispanic or latino	--	--	--	not reported	not reported	--	--	--	Clear cell adenocarcinoma, NOS	stage i	21281	M0	--	8310-03-01	--	--	--	--	--	--	--	--	--	--	--	2508	--	--	not reported	--	--	Kidney, NOS	not reported	--	--	not reported	--	--	--
TCGA-KIRC	08c1bb22-81f5-4a6d-98ce-f9c31d896eab	TCGA-AK-3461	--	male	1935	white	-26464	alive	--	not hispanic or latino	--	--	--	not reported	not reported	--	--	--	Clear cell adenocarcinoma, NOS	stage i	26464	M0	--	8310-03-01	--	--	--	--	--	--	--	--	--	--	--	2217	--	--	not reported	--	--	Kidney, NOS	not reported	--	--	not reported	--	--	--
TCGA-KIRC	0a93c52e-7e96-406b-b40d-b2925ba4ebd1	TCGA-AK-3465	--	female	1937	black or african american	-26232	alive	--	not hispanic or latino	--	--	--	not reported	not reported	--	--	--	Clear cell adenocarcinoma, NOS	stage i	26232	M0	--	8310-03-01	--	--	--	--	--	--	--	--	--	--	--	369	--	--	not reported	--	--	Kidney, NOS	not reported	--	--	not reported	--	--	--
TCGA-KIRC	e3aa5595-223b-42e9-aec0-e49f631e37d5	TCGA-AS-3777	--	male	1946	white	-23039	alive	--	not hispanic or latino	--	--	--	not reported	not reported	--	--	--	Clear cell adenocarcinoma, NOS	stage i	23039	M0	--	8310-03-01	--	--	--	--	--	--	--	--	--	--	--	1238	--	--	not reported	--	--	Kidney, NOS	not reported	--	--	not reported	--	--	--
TCGA-KIRC	7a4283eb-00e8-4174-b6b9-6d98c65932c5	TCGA-B0-4688	--	male	1962	white	-16804	dead	101	not hispanic or latino	2008	--	--	not reported	not reported	--	--	--	Clear cell adenocarcinoma, NOS	stage iv	16804	M1	--	8310-03-01	--	--	--	--	--	--	--	--	--	--	--	--	--	--	not reported	--	--	Kidney, NOS	not reported	--	--	not reported	--	--	--
TCGA-KIRC	5f0f03c2-4a39-48c4-a41d-c2990c422741	TCGA-B0-4690	--	male	1943	white	-23985	dead	43	not hispanic or latino	2008	--	--	not reported	not reported	--	--	--	Clear cell adenocarcinoma, NOS	stage iv	23985	M1	--	8310-03-01	--	--	--	--	--	--	--	--	--	--	--	--	--	--	not reported	--	--	Kidney, NOS	not reported	--	--	not reported	--	--	--
TCGA-KIRC	949736aa-62d3-46e0-8507-ed2a84be0073	TCGA-B0-4691	--	male	1954	white	-20176	dead	139	not hispanic or latino	2009	--	--	not reported	not reported	--	--	--	Clear cell adenocarcinoma, NOS	stage iv	20176	M1	--	8310-03-01	--	--	--	--	--	--	--	--	--	--	--	--	--	--	not reported	--	--	Kidney, NOS	not reported	--	--	not reported	--	--	--
TCGA-KIRC	12adefc4-c9fd-46d3-904b-8fc52d5f1913	TCGA-B0-4696	--	male	1943	white	-21317	dead	866	not hispanic or latino	2003	--	--	not reported	not reported	--	--	--	Clear cell adenocarcinoma, NOS	stage iii	21317	M0	--	8310-03-01	--	--	--	--	--	--	--	--	--	--	--	--	--	--	not reported	--	--	Kidney, NOS	not reported	--	--	not reported	--	--	--
TCGA-KIRC	18bcef21-1eee-4b9f-9345-b2f5799b49ab	TCGA-B0-4697	--	female	1957	white	-16844	dead	578	not hispanic or latino	2004	--	--	not reported	not reported	--	--	--	Clear cell adenocarcinoma, NOS	stage iv	16844	M1	--	8310-03-01	--	--	--	--	--	--	--	--	--	--	--	--	--	--	not reported	--	--	Kidney, NOS	not reported	--	--	not reported	--	--	--
TCGA-KIRC	5b66c4ae-3aed-4212-baa1-dac33bab8ebe	TCGA-B0-4698	--	male	1928	white	-27417	dead	42	not hispanic or latino	2003	--	--	not reported	not reported	--	--	--	Clear cell adenocarcinoma, NOS	stage iv	27417	M0	--	8310-03-01	--	--	--	--	--	--	--	--	--	--	--	--	--	--	not reported	--	--	Kidney, NOS	not reported	--	--	not reported	--	--	--
TCGA-KIRC	bcbab8ce-abf1-4029-9419-6b1c671d41df	TCGA-B0-4699	--	male	1930	white	-27225	dead	110	not hispanic or latino	2004	--	--	not reported	not reported	--	--	--	Clear cell adenocarcinoma, NOS	stage iv	27225	M1	--	8310-03-01	--	--	--	--	--	--	--	--	--	--	--	--	--	--	not reported	--	--	Kidney, NOS	not reported	--	--	not reported	--	--	--
TCGA-KIRC	e33dff22-5bf1-4dd8-bed7-063cb555677c	TCGA-B0-4700	--	male	1944	white	-22034	dead	1980	not hispanic or latino	2009	--	--	not reported	not reported	--	--	--	Clear cell adenocarcinoma, NOS	stage iv	22034	M1	--	8310-03-01	--	--	--	--	--	--	--	--	--	--	--	--	--	--	not reported	--	--	Kidney, NOS	not reported	--	--	not reported	--	--	--
TCGA-KIRC	6a7a0f51-336a-445d-8a05-8b8811894037	TCGA-B0-4701	--	female	1939	white	-24232	dead	238	not hispanic or latino	2005	--	--	not reported	not reported	--	--	--	Clear cell adenocarcinoma, NOS	stage iv	24232	M1	--	8310-03-01	--	--	--	--	--	--	--	--	--	--	--	--	--	--	not reported	--	--	Kidney, NOS	not reported	--	--	not reported	--	--	--
TCGA-KIRC	d599ff9b-66c7-4690-b37a-cb86bdda7782	TCGA-B0-4703	--	male	1954	white	-18921	dead	182	not hispanic or latino	2005	--	--	not reported	not reported	--	--	--	Clear cell adenocarcinoma, NOS	stage iv	18921	M1	--	8310-03-01	--	--	--	--	--	--	--	--	--	--	--	--	--	--	not reported	--	--	Kidney, NOS	not reported	--	--	not reported	--	--	--
TCGA-KIRC	26cc2c84-aaec-4cd1-9c45-dd08d372128d	TCGA-B0-4706	--	male	1946	white	-22331	dead	65	not hispanic or latino	2007	--	--	not reported	not reported	--	--	--	Clear cell adenocarcinoma, NOS	stage iii	22331	M0	--	8310-03-01	--	--	--	--	--	--	--	--	--	--	--	26	--	--	not reported	--	--	Kidney, NOS	not reported	--	--	not reported	--	--	--
TCGA-KIRC	4298ccdb-2e6d-4267-822d-75b021364084	TCGA-B0-4710	--	female	1935	white	-27396	alive	--	not hispanic or latino	--	--	--	not reported	not reported	--	--	--	Clear cell adenocarcinoma, NOS	stage iii	27396	M0	--	8310-03-01	--	--	--	--	--	--	--	--	--	--	--	1755	--	--	not reported	--	--	Kidney, NOS	not reported	--	--	not reported	--	--	--
TCGA-KIRC	3f72d63f-ad48-4500-baf6-897b1d6dda7d	TCGA-B0-4712	--	male	1930	white	-28095	dead	1337	not hispanic or latino	2009	--	--	not reported	not reported	--	--	--	Clear cell adenocarcinoma, NOS	stage iv	28095	M1	--	8310-03-01	--	--	--	--	--	--	--	--	--	--	--	--	--	--	not reported	--	--	Kidney, NOS	not reported	--	--	not reported	--	--	--
TCGA-KIRC	8d4b602b-d1a4-4d80-adf4-5f527de78d4b	TCGA-B0-4713	--	female	1934	white	-27899	dead	202	not hispanic or latino	2010	--	--	not reported	not reported	--	--	--	Clear cell adenocarcinoma, NOS	stage iii	27899	M0	--	8310-03-01	--	--	--	--	--	--	--	--	--	--	--	--	--	--	not reported	--	--	Kidney, NOS	not reported	--	--	not reported	--	--	--
TCGA-KIRC	98ff8a6b-0ead-4e55-9fb7-6fe5cc69d0f6	TCGA-B0-4714	--	male	1929	white	-29873	dead	99	not hispanic or latino	2010	--	--	not reported	not reported	--	--	--	Clear cell adenocarcinoma, NOS	stage iv	29873	M1	--	8310-03-01	--	--	--	--	--	--	--	--	--	--	--	--	--	--	not reported	--	--	Kidney, NOS	not reported	--	--	not reported	--	--	--
TCGA-KIRC	75801b19-6569-4345-8134-82344a412c21	TCGA-B0-4718	--	male	1953	white	-20910	alive	--	not hispanic or latino	--	--	--	not reported	not reported	--	--	--	Clear cell adenocarcinoma, NOS	stage iii	20910	M0	--	8310-03-01	--	--	--	--	--	--	--	--	--	--	--	1778	--	--	not reported	--	--	Kidney, NOS	not reported	--	--	not reported	--	--	--
TCGA-KIRC	3dd36758-04ad-4ba4-bf17-707649d6f1a0	TCGA-B0-4810	--	male	1954	white	-17402	dead	478	not hispanic or latino	2002	--	--	not reported	not reported	--	--	--	Clear cell adenocarcinoma, NOS	stage iii	17402	M0	--	8310-03-01	--	--	--	--	--	--	--	--	--	--	--	--	--	--	not reported	--	--	Kidney, NOS	not reported	--	--	not reported	--	--	--
TCGA-KIRC	57578a0d-b719-46e7-83ab-872a4e984dbb	TCGA-B0-4811	--	male	1953	white	-17792	dead	1417	not hispanic or latino	2004	--	--	not reported	not reported	--	--	--	Clear cell adenocarcinoma, NOS	stage iii	17792	M0	--	8310-03-01	--	--	--	--	--	--	--	--	--	--	--	--	--	--	not reported	--	--	Kidney, NOS	not reported	--	--	not reported	--	--	--
TCGA-KIRC	8942ebfa-946a-41a7-8b4c-ce45a2096c81	TCGA-B0-4813	--	male	1933	white	-25018	dead	18	not hispanic or latino	2001	--	--	not reported	not reported	--	--	--	Clear cell adenocarcinoma, NOS	stage iii	25018	M0	--	8310-03-01	--	--	--	--	--	--	--	--	--	--	--	18	--	--	not reported	--	--	Kidney, NOS	not reported	--	--	not reported	--	--	--
TCGA-KIRC	420409bb-0889-40a1-80cf-9b5916704f04	TCGA-B0-4814	--	male	1943	white	-21374	dead	168	not hispanic or latino	2001	--	--	not reported	not reported	--	--	--	Clear cell adenocarcinoma, NOS	stage iv	21374	M1	--	8310-03-01	--	--	--	--	--	--	--	--	--	--	--	--	--	--	not reported	--	--	Kidney, NOS	not reported	--	--	not reported	--	--	--
TCGA-KIRC	ff127be4-631a-4e0e-a971-842f9eb6760e	TCGA-B0-4815	--	male	1936	white	-23873	dead	1588	not hispanic or latino	2005	--	--	not reported	not reported	--	--	--	Clear cell adenocarcinoma, NOS	stage iii	23873	M0	--	8310-03-01	--	--	--	--	--	--	--	--	--	--	--	--	--	--	not reported	--	--	Kidney, NOS	not reported	--	--	not reported	--	--	--
TCGA-KIRC	44130745-0b09-4201-829f-cc634f462d3b	TCGA-B0-4816	--	male	1953	white	-18133	dead	1371	not hispanic or latino	2005	--	--	not reported	not reported	--	--	--	Clear cell adenocarcinoma, NOS	stage ii	18133	M0	--	8310-03-01	--	--	--	--	--	--	--	--	--	--	--	--	--	--	not reported	--	--	Kidney, NOS	not reported	--	--	not reported	--	--	--
TCGA-KIRC	b764e6a1-da21-4593-b133-25827c5b8d47	TCGA-B0-4817	--	male	1921	white	-29873	dead	1019	not hispanic or latino	2004	--	--	not reported	not reported	--	--	--	Clear cell adenocarcinoma, NOS	stage iii	29873	M0	--	8310-03-01	--	--	--	--	--	--	--	--	--	--	--	--	--	--	not reported	--	--	Kidney, NOS	not reported	--	--	not reported	--	--	--
TCGA-KIRC	52d80054-3745-438c-b96e-e344c4ee4a5d	TCGA-B0-4819	--	female	1942	white	-22220	dead	183	not hispanic or latino	2002	--	--	not reported	not reported	--	--	--	Clear cell adenocarcinoma, NOS	stage iv	22220	M1	--	8310-03-01	--	--	--	--	--	--	--	--	--	--	--	183	--	--	not reported	--	--	Kidney, NOS	not reported	--	--	not reported	--	--	--
TCGA-KIRC	8d769b38-862f-46e3-a426-d09f79f28de6	TCGA-B0-4821	--	female	1934	asian	-25013	dead	1230	not hispanic or latino	2005	--	--	not reported	not reported	--	--	--	Clear cell adenocarcinoma, NOS	stage iii	25013	M0	--	8310-03-01	--	--	--	--	--	--	--	--	--	--	--	--	--	--	not reported	--	--	Kidney, NOS	not reported	--	--	not reported	--	--	--
TCGA-KIRC	a46f36c3-e886-4efe-945a-0cb2e5b765ef	TCGA-B0-4822	--	male	1924	white	-28774	dead	1111	not hispanic or latino	2005	--	--	not reported	not reported	--	--	--	Clear cell adenocarcinoma, NOS	stage ii	28774	M0	--	8310-03-01	--	--	--	--	--	--	--	--	--	--	--	--	--	--	not reported	--	--	Kidney, NOS	not reported	--	--	not reported	--	--	--
TCGA-KIRC	03905b58-4b13-410c-8e92-115ab2a42e80	TCGA-B0-4824	--	female	1953	white	-18132	dead	1657	not hispanic or latino	2006	--	--	not reported	not reported	--	--	--	Clear cell adenocarcinoma, NOS	stage i	18132	M0	--	8310-03-01	--	--	--	--	--	--	--	--	--	--	--	--	--	--	not reported	--	--	Kidney, NOS	not reported	--	--	not reported	--	--	--
TCGA-KIRC	1e758394-67fb-45cb-98b0-5082c396d697	TCGA-B0-4828	--	male	1924	white	-28948	dead	307	not hispanic or latino	2003	--	--	not reported	not reported	--	--	--	Clear cell adenocarcinoma, NOS	stage iv	28948	M1	--	8310-03-01	--	--	--	--	--	--	--	--	--	--	--	--	--	--	not reported	--	--	Kidney, NOS	not reported	--	--	not reported	--	--	--
TCGA-KIRC	e4769374-7d4d-4aaf-b6fe-a01da59ee713	TCGA-B0-4833	--	female	1921	white	-30190	dead	2386	not hispanic or latino	2009	--	--	not reported	not reported	--	--	--	Clear cell adenocarcinoma, NOS	stage i	30190	M0	--	8310-03-01	--	--	--	--	--	--	--	--	--	--	--	--	--	--	not reported	--	--	Kidney, NOS	not reported	--	--	not reported	--	--	--
TCGA-KIRC	31e9d2fc-79fa-49db-adac-7afb9609f915	TCGA-B0-4837	--	male	1940	white	-23129	dead	1378	not hispanic or latino	2006	--	--	not reported	not reported	--	--	--	Clear cell adenocarcinoma, NOS	stage i	23129	M0	--	8310-03-01	--	--	--	--	--	--	--	--	--	--	--	--	--	--	not reported	--	--	Kidney, NOS	not reported	--	--	not reported	--	--	--
TCGA-KIRC	414056a2-b1dc-4741-b9b9-fda306da6ad6	TCGA-B0-4839	--	female	1923	white	-29380	dead	1639	not hispanic or latino	2007	--	--	not reported	not reported	--	--	--	Clear cell adenocarcinoma, NOS	stage i	29380	M0	--	8310-03-01	--	--	--	--	--	--	--	--	--	--	--	--	--	--	not reported	--	--	Kidney, NOS	not reported	--	--	not reported	--	--	--
TCGA-KIRC	77d8c2cf-6b27-417b-9d43-14c95e6f9b85	TCGA-B0-4841	--	male	1941	white	-23097	dead	204	not hispanic or latino	2004	--	--	not reported	not reported	--	--	--	Clear cell adenocarcinoma, NOS	stage iv	23097	M1	--	8310-03-01	--	--	--	--	--	--	--	--	--	--	--	--	--	--	not reported	--	--	Kidney, NOS	not reported	--	--	not reported	--	--	--
TCGA-KIRC	4ee14e95-09d8-4512-b358-3e0e7cb74c9a	TCGA-B0-4844	--	male	1944	white	-22220	dead	313	not hispanic or latino	2004	--	--	not reported	not reported	--	--	--	Clear cell adenocarcinoma, NOS	stage iv	22220	M1	--	8310-03-01	--	--	--	--	--	--	--	--	--	--	--	--	--	--	not reported	--	--	Kidney, NOS	not reported	--	--	not reported	--	--	--
TCGA-KIRC	cf77fe39-0b4a-4b38-b563-2a244b9fb5c0	TCGA-B0-4845	--	male	1933	white	-25582	dead	1986	not hispanic or latino	2008	--	--	not reported	not reported	--	--	--	Clear cell adenocarcinoma, NOS	stage iv	25582	M1	--	8310-03-01	--	--	--	--	--	--	--	--	--	--	--	--	--	--	not reported	--	--	Kidney, NOS	not reported	--	--	not reported	--	--	--
TCGA-KIRC	d99f31f7-2b3b-47e8-bd26-8d37da22aca0	TCGA-B0-4846	--	male	1952	white	-19139	dead	1200	not hispanic or latino	2007	--	--	not reported	not reported	--	--	--	Clear cell adenocarcinoma, NOS	stage iv	19139	M1	--	8310-03-01	--	--	--	--	--	--	--	--	--	--	--	--	--	--	not reported	--	--	Kidney, NOS	not reported	--	--	not reported	--	--	--
TCGA-KIRC	844ec449-eec0-4ea7-9da9-b75a164bef16	TCGA-B0-4847	--	male	1944	white	-22147	dead	793	not hispanic or latino	2006	--	--	not reported	not reported	--	--	--	Clear cell adenocarcinoma, NOS	stage iv	22147	M1	--	8310-03-01	--	--	--	--	--	--	--	--	--	--	--	--	--	--	not reported	--	--	Kidney, NOS	not reported	--	--	not reported	--	--	--
TCGA-KIRC	9d202594-7697-443f-a1ee-d8e7b28ecb8f	TCGA-B0-4849	--	male	1953	white	-18843	dead	69	not hispanic or latino	2004	--	--	not reported	not reported	--	--	--	Clear cell adenocarcinoma, NOS	stage iii	18843	M0	--	8310-03-01	--	--	--	--	--	--	--	--	--	--	--	--	--	--	not reported	--	--	Kidney, NOS	not reported	--	--	not reported	--	--	--
TCGA-KIRC	759238f2-0d37-404e-96f1-c26cae0ba2ea	TCGA-B0-4852	--	female	1926	white	-28552	dead	1121	not hispanic or latino	2007	--	--	not reported	not reported	--	--	--	Clear cell adenocarcinoma, NOS	stage ii	28552	M0	--	8310-03-01	--	--	--	--	--	--	--	--	--	--	--	--	--	--	not reported	--	--	Kidney, NOS	not reported	--	--	not reported	--	--	--
TCGA-KIRC	f184de71-65d0-4e52-aec2-25c5414588c5	TCGA-B0-4945	--	female	1928	white	-27523	dead	2145	not hispanic or latino	2008	--	--	not reported	not reported	--	--	--	Clear cell adenocarcinoma, NOS	stage i	27523	M0	--	8310-03-01	--	--	--	--	--	--	--	--	--	--	--	--	--	--	not reported	--	--	Kidney, NOS	not reported	--	--	not reported	--	--	--
TCGA-KIRC	46194f7f-af16-42b7-bef6-9c0d1e8f9b0d	TCGA-B0-5075	--	female	1928	white	-28205	dead	637	not hispanic or latino	2006	--	--	not reported	not reported	--	--	--	Clear cell adenocarcinoma, NOS	stage iii	28205	M0	--	8310-03-01	--	--	--	--	--	--	--	--	--	--	--	--	--	--	not reported	--	--	Kidney, NOS	not reported	--	--	not reported	--	--	--
TCGA-KIRC	03b2ac94-05a3-49a7-b68f-51d045395b07	TCGA-B0-5077	--	male	1928	white	-28405	dead	1317	not hispanic or latino	2008	--	--	not reported	not reported	--	--	--	Clear cell adenocarcinoma, NOS	stage i	28405	M0	--	8310-03-01	--	--	--	--	--	--	--	--	--	--	--	--	--	--	not reported	--	--	Kidney, NOS	not reported	--	--	not reported	--	--	--
TCGA-KIRC	f57690ba-a120-4ea2-83e0-0559d1eb62c4	TCGA-B0-5080	--	male	1942	white	-23052	dead	342	not hispanic or latino	2005	--	--	not reported	not reported	--	--	--	Clear cell adenocarcinoma, NOS	stage iv	23052	M1	--	8310-03-01	--	--	--	--	--	--	--	--	--	--	--	--	--	--	not reported	--	--	Kidney, NOS	not reported	--	--	not reported	--	--	--
TCGA-KIRC	479035f0-649e-4396-b023-1649a23a01f1	TCGA-B0-5081	--	female	1926	white	-29219	dead	362	not hispanic or latino	2005	--	--	not reported	not reported	--	--	--	Clear cell adenocarcinoma, NOS	stage iii	29219	M0	--	8310-03-01	--	--	--	--	--	--	--	--	--	--	--	--	--	--	not reported	--	--	Kidney, NOS	not reported	--	--	not reported	--	--	--
TCGA-KIRC	e9f855b3-291b-449d-9758-caa0f99fa76d	TCGA-B0-5084	--	male	1973	white	-12219	dead	222	not hispanic or latino	2006	--	--	not reported	not reported	--	--	--	Clear cell adenocarcinoma, NOS	stage iv	12219	M1	--	8310-03-01	--	--	--	--	--	--	--	--	--	--	--	--	--	--	not reported	--	--	Kidney, NOS	not reported	--	--	not reported	--	--	--
TCGA-KIRC	62c6edc7-170d-4825-ab81-f88b14013cc5	TCGA-B0-5085	--	female	1929	white	-27793	dead	770	not hispanic or latino	2007	--	--	not reported	not reported	--	--	--	Clear cell adenocarcinoma, NOS	stage iii	27793	M0	--	8310-03-01	--	--	--	--	--	--	--	--	--	--	--	--	--	--	not reported	--	--	Kidney, NOS	not reported	--	--	not reported	--	--	--
TCGA-KIRC	0022478c-4dfd-4cbe-a05e-fb20310844e3	TCGA-B0-5088	--	male	1953	white	-19677	dead	563	not hispanic or latino	2007	--	--	not reported	not reported	--	--	--	Clear cell adenocarcinoma, NOS	stage i	19677	M0	--	8310-03-01	--	--	--	--	--	--	--	--	--	--	--	--	--	--	not reported	--	--	Kidney, NOS	not reported	--	--	not reported	--	--	--
TCGA-KIRC	d51fa004-23e6-41a7-9237-ce9916e2e394	TCGA-B0-5092	--	female	1955	white	-19611	dead	459	not hispanic or latino	2009	--	--	not reported	not reported	--	--	--	Clear cell adenocarcinoma, NOS	stage iv	19611	M1	--	8310-03-01	--	--	--	--	--	--	--	--	--	--	--	--	--	--	not reported	--	--	Kidney, NOS	not reported	--	--	not reported	--	--	--
TCGA-KIRC	616bc43c-34b9-48e8-8219-4ef4d052f91b	TCGA-B0-5095	--	male	1927	white	-29921	dead	245	not hispanic or latino	2008	--	--	not reported	not reported	--	--	--	Clear cell adenocarcinoma, NOS	stage iii	29921	M0	--	8310-03-01	--	--	--	--	--	--	--	--	--	--	--	--	--	--	not reported	--	--	Kidney, NOS	not reported	--	--	not reported	--	--	--
TCGA-KIRC	03ae8fdb-8a9c-401d-b8e3-b5ea57bad182	TCGA-B0-5097	--	female	1951	white	-21852	alive	--	not hispanic or latino	--	--	--	not reported	not reported	--	--	--	Clear cell adenocarcinoma, NOS	stage iii	21852	M0	--	8310-03-01	--	--	--	--	--	--	--	--	--	--	--	665	--	--	not reported	--	--	Kidney, NOS	not reported	--	--	not reported	--	--	--
TCGA-KIRC	3be0bc1d-d81f-4769-b650-8cc8858e45db	TCGA-B0-5098	--	female	1945	black or african american	-19620	dead	1584	not hispanic or latino	2002	--	--	not reported	not reported	--	--	--	Clear cell adenocarcinoma, NOS	stage i	19620	M0	--	8310-03-01	--	--	--	--	--	--	--	--	--	--	--	--	--	--	not reported	--	--	Kidney, NOS	not reported	--	--	not reported	--	--	--
TCGA-KIRC	bcf26561-6e11-441c-955e-181ef2e68b41	TCGA-B0-5099	--	female	1914	white	-32364	dead	485	not hispanic or latino	2003	--	--	not reported	not reported	--	--	--	Clear cell adenocarcinoma, NOS	stage iii	32364	M0	--	8310-03-01	--	--	--	--	--	--	--	--	--	--	--	--	--	--	not reported	--	--	Kidney, NOS	not reported	--	--	not reported	--	--	--
TCGA-KIRC	9cffe9f2-421e-4596-b3ac-8788f862ab59	TCGA-B0-5102	--	female	1925	white	-27152	dead	2764	not hispanic or latino	2006	--	--	not reported	not reported	--	--	--	Clear cell adenocarcinoma, NOS	stage i	27152	M0	--	8310-03-01	--	--	--	--	--	--	--	--	--	--	--	--	--	--	not reported	--	--	Kidney, NOS	not reported	--	--	not reported	--	--	--
TCGA-KIRC	fb3a387f-ebc6-4422-a782-5c19056f77f2	TCGA-B0-5104	--	female	1912	white	-32872	dead	2752	not hispanic or latino	2009	--	--	not reported	not reported	--	--	--	Clear cell adenocarcinoma, NOS	stage i	32872	M0	--	8310-03-01	--	--	--	--	--	--	--	--	--	--	--	--	--	--	not reported	--	--	Kidney, NOS	not reported	--	--	not reported	--	--	--
TCGA-KIRC	e7c8a4d3-d51e-482a-9045-4de9c9f29945	TCGA-B0-5106	--	male	1940	white	-23547	dead	1598	not hispanic or latino	2008	--	--	not reported	not reported	--	--	--	Clear cell adenocarcinoma, NOS	stage i	23547	M0	--	8310-03-01	--	--	--	--	--	--	--	--	--	--	--	--	--	--	not reported	--	--	Kidney, NOS	not reported	--	--	not reported	--	--	--
TCGA-KIRC	6b1ff32f-75a4-44aa-9da4-b6872e179c9f	TCGA-B0-5107	--	female	1942	white	-23929	dead	927	not hispanic or latino	2009	--	--	not reported	not reported	--	--	--	Clear cell adenocarcinoma, NOS	stage iv	23929	M1	--	8310-03-01	--	--	--	--	--	--	--	--	--	--	--	--	--	--	not reported	--	--	Kidney, NOS	not reported	--	--	not reported	--	--	--
TCGA-KIRC	171044a9-9e8e-419b-af3a-4849d92c3b1e	TCGA-B0-5108	--	male	1955	white	-19932	alive	--	not hispanic or latino	--	--	--	not reported	not reported	--	--	--	Clear cell adenocarcinoma, NOS	stage iii	19932	M0	--	8310-03-01	--	--	--	--	--	--	--	--	--	--	--	1782	--	--	not reported	--	--	Kidney, NOS	not reported	--	--	not reported	--	--	--
TCGA-KIRC	b7143068-4afd-47ed-9e08-1894f886c503	TCGA-B0-5109	--	male	1940	white	-25428	dead	587	not hispanic or latino	2010	--	--	not reported	not reported	--	--	--	Clear cell adenocarcinoma, NOS	stage iii	25428	M0	--	8310-03-01	--	--	--	--	--	--	--	--	--	--	--	--	--	--	not reported	--	--	Kidney, NOS	not reported	--	--	not reported	--	--	--
TCGA-KIRC	f3a921d5-7a6d-4a6e-893b-a5e1d3f4750b	TCGA-B0-5110	--	female	1938	white	-25976	alive	--	not hispanic or latino	--	--	--	not reported	not reported	--	--	--	Clear cell adenocarcinoma, NOS	stage i	25976	M0	--	8310-03-01	--	--	--	--	--	--	--	--	--	--	--	2009	--	--	not reported	--	--	Kidney, NOS	not reported	--	--	not reported	--	--	--
TCGA-KIRC	439794a8-51bd-4c70-968c-34cf26b90148	TCGA-B0-5113	--	female	1941	white	-25369	alive	--	not hispanic or latino	--	--	--	not reported	not reported	--	--	--	Clear cell adenocarcinoma, NOS	stage iii	25369	M0	--	8310-03-01	--	--	--	--	--	--	--	--	--	--	--	1175	--	--	not reported	--	--	Kidney, NOS	not reported	--	--	not reported	--	--	--
TCGA-KIRC	46bc69a9-0090-4809-92b8-8cb741d9007d	TCGA-B0-5115	--	male	1966	white	-15935	alive	--	not hispanic or latino	--	--	--	not reported	not reported	--	--	--	Clear cell adenocarcinoma, NOS	stage iv	15935	M1	--	8310-03-01	--	--	--	--	--	--	--	--	--	--	--	1604	--	--	not reported	--	--	Kidney, NOS	not reported	--	--	not reported	--	--	--
TCGA-KIRC	c5bf474c-6919-47b4-ba59-34ab20c087d5	TCGA-B0-5120	--	female	1938	white	-26559	alive	--	not hispanic or latino	--	--	--	not reported	not reported	--	--	--	Clear cell adenocarcinoma, NOS	stage i	26559	M0	--	8310-03-01	--	--	--	--	--	--	--	--	--	--	--	1169	--	--	not reported	--	--	Kidney, NOS	not reported	--	--	not reported	--	--	--
TCGA-KIRC	73512f9d-c6e4-446f-8e31-666c6af44da5	TCGA-B0-5121	--	male	1954	white	-20635	alive	--	not hispanic or latino	--	--	--	not reported	not reported	--	--	--	Clear cell adenocarcinoma, NOS	stage i	20635	M0	--	8310-03-01	--	--	--	--	--	--	--	--	--	--	--	1485	--	--	not reported	--	--	Kidney, NOS	not reported	--	--	not reported	--	--	--
TCGA-KIRC	f6d3e963-5bff-40f6-8430-1c6fb5ec6503	TCGA-B0-5399	--	male	1964	white	-17145	alive	--	not hispanic or latino	--	--	--	not reported	not reported	--	--	--	Clear cell adenocarcinoma, NOS	stage i	17145	M0	--	8310-03-01	--	--	--	--	--	--	--	--	--	--	--	1411	--	--	not reported	--	--	Kidney, NOS	not reported	--	--	not reported	--	--	--
TCGA-KIRC	9c377f9b-79dd-4412-80ac-cea9a3529888	TCGA-B0-5692	--	female	1938	white	-24140	alive	--	not hispanic or latino	--	--	--	not reported	not reported	--	--	--	Clear cell adenocarcinoma, NOS	stage iii	24140	M0	--	8310-03-01	--	--	--	--	--	--	--	--	--	--	--	3944	--	--	not reported	--	--	Kidney, NOS	not reported	--	--	not reported	--	--	--
TCGA-KIRC	db058eb4-9c5e-4226-92d1-de24aea83630	TCGA-B0-5693	--	female	1956	white	-17177	alive	--	not hispanic or latino	--	--	--	not reported	not reported	--	--	--	Clear cell adenocarcinoma, NOS	stage i	17177	M0	--	8310-03-01	--	--	--	--	--	--	--	--	--	--	--	4074	--	--	not reported	--	--	Kidney, NOS	not reported	--	--	not reported	--	--	--
TCGA-KIRC	fb9bafa5-7133-4955-8156-4eb6763dc8e1	TCGA-B0-5695	--	female	1946	white	-22320	alive	--	not hispanic or latino	--	--	--	not reported	not reported	--	--	--	Clear cell adenocarcinoma, NOS	stage i	22320	M0	--	8310-03-01	--	--	--	--	--	--	--	--	--	--	--	2150	--	--	not reported	--	--	Kidney, NOS	not reported	--	--	not reported	--	--	--
TCGA-KIRC	1d176c53-6cbb-4a39-9a6f-669b4f1cb575	TCGA-B0-5696	--	male	1938	white	-25552	alive	--	hispanic or latino	--	--	--	not reported	not reported	--	--	--	Clear cell adenocarcinoma, NOS	stage iii	25552	M0	--	8310-03-01	--	--	--	--	--	--	--	--	--	--	--	2609	--	--	not reported	--	--	Kidney, NOS	not reported	--	--	not reported	--	--	--
TCGA-KIRC	d26f3a6b-72f4-4e48-815e-57b8b211112d	TCGA-B0-5698	--	male	1928	black or african american	-28438	alive	--	not hispanic or latino	--	--	--	not reported	not reported	--	--	--	Clear cell adenocarcinoma, NOS	stage i	28438	M0	--	8310-03-01	--	--	--	--	--	--	--	--	--	--	--	3631	--	--	not reported	--	--	Kidney, NOS	not reported	--	--	not reported	--	--	--
TCGA-KIRC	c814c26c-ee8e-4fd8-a3d3-441b302ead3b	TCGA-B0-5699	--	male	1950	white	-19647	alive	--	not hispanic or latino	--	--	--	not reported	not reported	--	--	--	Clear cell adenocarcinoma, NOS	stage i	19647	M0	--	8310-03-01	--	--	--	--	--	--	--	--	--	--	--	3841	--	--	not reported	--	--	Kidney, NOS	not reported	--	--	not reported	--	--	--
TCGA-KIRC	8f8a632d-7fbd-4c86-b909-afb7edb9ad28	TCGA-B0-5701	--	male	1942	white	-23915	alive	--	not hispanic or latino	--	--	--	not reported	not reported	--	--	--	Clear cell adenocarcinoma, NOS	stage iii	23915	M0	--	8310-03-01	--	--	--	--	--	--	--	--	--	--	--	2461	--	--	not reported	--	--	Kidney, NOS	not reported	--	--	not reported	--	--	--
TCGA-KIRC	74844571-c5a3-4a14-ac19-c7c1ce40259b	TCGA-B0-5702	--	male	1936	white	-26186	alive	--	not hispanic or latino	--	--	--	not reported	not reported	--	--	--	Clear cell adenocarcinoma, NOS	stage i	26186	M0	--	8310-03-01	--	--	--	--	--	--	--	--	--	--	--	2172	--	--	not reported	--	--	Kidney, NOS	not reported	--	--	not reported	--	--	--
TCGA-KIRC	576ea0ef-3abb-479d-adb7-ba646cee344e	TCGA-B0-5703	--	male	1936	white	-26897	alive	--	not hispanic or latino	--	--	--	not reported	not reported	--	--	--	Clear cell adenocarcinoma, NOS	stage i	26897	M0	--	8310-03-01	--	--	--	--	--	--	--	--	--	--	--	2246	--	--	not reported	--	--	Kidney, NOS	not reported	--	--	not reported	--	--	--
TCGA-KIRC	62cf9546-b932-4a5e-bc9b-4103506d296d	TCGA-B0-5705	--	female	1937	white	-23746	alive	--	not hispanic or latino	--	--	--	not reported	not reported	--	--	--	Clear cell adenocarcinoma, NOS	stage i	23746	M0	--	8310-03-01	--	--	--	--	--	--	--	--	--	--	--	4537	--	--	not reported	--	--	Kidney, NOS	not reported	--	--	not reported	--	--	--
TCGA-KIRC	bf768635-b809-4df4-a4e6-7495e66aa227	TCGA-B0-5709	--	female	1941	white	-22843	alive	--	not hispanic or latino	--	--	--	not reported	not reported	--	--	--	Clear cell adenocarcinoma, NOS	stage iii	22843	M0	--	8310-03-01	--	--	--	--	--	--	--	--	--	--	--	3974	--	--	not reported	--	--	Kidney, NOS	not reported	--	--	not reported	--	--	--
TCGA-KIRC	514af471-31d2-43fa-88dc-8639a5e97181	TCGA-B0-5712	--	female	1936	black or african american	-24988	alive	--	not hispanic or latino	--	--	--	not reported	not reported	--	--	--	Clear cell adenocarcinoma, NOS	stage iv	24988	M1	--	8310-03-01	--	--	--	--	--	--	--	--	--	--	--	2722	--	--	not reported	--	--	Kidney, NOS	not reported	--	--	not reported	--	--	--
TCGA-KIRC	326745d8-98ca-4f4d-b217-96aea9faa1ad	TCGA-B0-5812	--	male	1950	white	-19600	alive	--	not hispanic or latino	--	--	--	not reported	not reported	--	--	--	Clear cell adenocarcinoma, NOS	stage i	19600	M0	--	8310-03-01	--	--	--	--	--	--	--	--	--	--	--	3834	--	--	not reported	--	--	Kidney, NOS	not reported	--	--	not reported	--	--	--
TCGA-KIRC	424e5c99-3693-4b10-bbf0-fc43e851610c	TCGA-B2-3924	--	male	1937	white	-26846	alive	--	not hispanic or latino	--	--	--	not reported	not reported	--	--	--	Clear cell adenocarcinoma, NOS	stage i	26846	M0	--	8310-03-01	--	--	--	--	--	--	--	--	--	--	--	1092	--	--	not reported	--	--	Kidney, NOS	not reported	--	--	not reported	--	--	--
TCGA-KIRC	52d73201-9333-422f-a530-5958e866a298	TCGA-B2-4098	--	female	1938	black or african american	-26606	dead	51	not hispanic or latino	2010	--	--	not reported	not reported	--	--	--	Clear cell adenocarcinoma, NOS	stage i	26606	M0	--	8310-03-01	--	--	--	--	--	--	--	--	--	--	--	--	--	--	not reported	--	--	Kidney, NOS	not reported	--	--	not reported	--	--	--
TCGA-KIRC	1adb05d4-e1ca-4ede-81c7-ff24a243abae	TCGA-B2-4099	--	male	1927	white	-30355	alive	--	not hispanic or latino	--	--	--	not reported	not reported	--	--	--	Clear cell adenocarcinoma, NOS	stage i	30355	M0	--	8310-03-01	--	--	--	--	--	--	--	--	--	--	--	972	--	--	not reported	--	--	Kidney, NOS	not reported	--	--	not reported	--	--	--
TCGA-KIRC	cfc999aa-802e-4a0d-8b14-be2b19fa2a17	TCGA-B2-4101	--	male	1958	white	-19059	alive	--	not hispanic or latino	--	--	--	not reported	not reported	--	--	--	Clear cell adenocarcinoma, NOS	stage ii	19059	M0	--	8310-03-01	--	--	--	--	--	--	--	--	--	--	--	648	--	--	not reported	--	--	Kidney, NOS	not reported	--	--	not reported	--	--	--
TCGA-KIRC	bbbce1ba-c739-43ba-b9cf-a4f746491ae3	TCGA-B2-4102	--	male	1949	white	-22492	alive	--	not hispanic or latino	--	--	--	not reported	not reported	--	--	--	Clear cell adenocarcinoma, NOS	stage i	22492	M0	--	8310-03-01	--	--	--	--	--	--	--	--	--	--	--	952	--	--	not reported	--	--	Kidney, NOS	not reported	--	--	not reported	--	--	--
TCGA-KIRC	7d35b1e4-8dcf-4caa-adce-e4b72a2a10ca	TCGA-B2-5633	--	male	1954	white	-20493	alive	--	not hispanic or latino	--	--	--	not reported	not reported	--	--	--	Clear cell adenocarcinoma, NOS	stage i	20493	M0	--	8310-03-01	--	--	--	--	--	--	--	--	--	--	--	963	--	--	not reported	--	--	Kidney, NOS	not reported	--	--	not reported	--	--	--
TCGA-KIRC	ed2e9354-5ee1-4fcf-92ec-a1b507818b91	TCGA-B2-5636	--	male	1931	white	-28901	alive	--	not hispanic or latino	--	--	--	not reported	not reported	--	--	--	Clear cell adenocarcinoma, NOS	stage i	28901	M0	--	8310-03-01	--	--	--	--	--	--	--	--	--	--	--	919	--	--	not reported	--	--	Kidney, NOS	not reported	--	--	not reported	--	--	--
TCGA-KIRC	fc7065fc-d834-4e7d-98bd-ca6666beb6cb	TCGA-B2-A4SR	--	male	1951	black or african american	-22637	alive	--	not hispanic or latino	--	--	--	not reported	not reported	--	--	--	Clear cell adenocarcinoma, NOS	stage ii	22637	M0	--	8310-03-01	--	--	--	--	--	--	--	--	--	--	--	507	--	--	not reported	--	--	Kidney, NOS	not reported	--	--	not reported	--	--	--
TCGA-KIRC	551e8a06-382f-4cc3-b6b4-6ad61181f1f7	TCGA-B4-5378	--	male	1948	white	-22980	alive	--	not hispanic or latino	--	--	--	not reported	not reported	--	--	--	Clear cell adenocarcinoma, NOS	stage i	22980	M0	--	8310-03-01	--	--	--	--	--	--	--	--	--	--	--	175	--	--	not reported	--	--	Kidney, NOS	not reported	--	--	not reported	--	--	--
TCGA-KIRC	75e02a42-6937-4761-868b-c369c7bd3c72	TCGA-B4-5832	--	male	1945	white	-23806	alive	--	not hispanic or latino	--	--	--	not reported	not reported	--	--	--	Clear cell adenocarcinoma, NOS	stage iii	23806	M0	--	8310-03-01	--	--	--	--	--	--	--	--	--	--	--	155	--	--	not reported	--	--	Kidney, NOS	not reported	--	--	not reported	--	--	--
TCGA-KIRC	1bc2ad71-fb9d-4012-bfe7-c39e215a51eb	TCGA-B4-5835	--	female	1946	white	-23408	alive	--	not hispanic or latino	--	--	--	not reported	not reported	--	--	--	Clear cell adenocarcinoma, NOS	stage i	23408	M0	--	8310-03-01	--	--	--	--	--	--	--	--	--	--	--	16	--	--	not reported	--	--	Kidney, NOS	not reported	--	--	not reported	--	--	--
TCGA-KIRC	dfa9513d-4e09-405b-a80f-2987ec5c5263	TCGA-B8-4143	--	female	1936	white	-24132	dead	709	not hispanic or latino	2003	--	--	not reported	not reported	--	--	--	Clear cell adenocarcinoma, NOS	stage iv	24132	M1	--	8310-03-01	--	--	--	--	--	--	--	--	--	--	--	--	--	--	not reported	--	--	Kidney, NOS	not reported	--	--	not reported	--	--	--
TCGA-KIRC	18325fdc-594b-4545-a77d-adb07a32ec73	TCGA-B8-4148	--	female	1946	white	-23062	alive	--	not hispanic or latino	--	--	--	not reported	not reported	--	--	--	Clear cell adenocarcinoma, NOS	stage i	23062	M0	--	8310-03-01	--	--	--	--	--	--	--	--	--	--	--	1520	--	--	not reported	--	--	Kidney, NOS	not reported	--	--	not reported	--	--	--
TCGA-KIRC	b428463a-75d5-4663-a53b-ec2993795cc0	TCGA-B8-4151	--	female	1958	white	-18760	alive	--	hispanic or latino	--	--	--	not reported	not reported	--	--	--	Clear cell adenocarcinoma, NOS	stage iii	18760	M0	--	8310-03-01	--	--	--	--	--	--	--	--	--	--	--	1299	--	--	not reported	--	--	Kidney, NOS	not reported	--	--	not reported	--	--	--
TCGA-KIRC	a22d5ba2-5f11-49e9-911a-ec03b785fae5	TCGA-B8-4153	--	male	1936	white	-27031	alive	--	not hispanic or latino	--	--	--	not reported	not reported	--	--	--	Clear cell adenocarcinoma, NOS	stage iii	27031	M0	--	8310-03-01	--	--	--	--	--	--	--	--	--	--	--	762	--	--	not reported	--	--	Kidney, NOS	not reported	--	--	not reported	--	--	--
TCGA-KIRC	8c6720ef-4f85-4d22-b9bc-6745b55bf6d8	TCGA-B8-4154	--	female	1937	white	-26882	alive	--	not hispanic or latino	--	--	--	not reported	not reported	--	--	--	Clear cell adenocarcinoma, NOS	stage i	26882	M0	--	8310-03-01	--	--	--	--	--	--	--	--	--	--	--	1380	--	--	not reported	--	--	Kidney, NOS	not reported	--	--	not reported	--	--	--
TCGA-KIRC	78ec8bc9-e502-4f5b-b0f6-893718650352	TCGA-B8-4619	--	male	1952	white	-21206	alive	--	not hispanic or latino	--	--	--	not reported	not reported	--	--	--	Clear cell adenocarcinoma, NOS	stage i	21206	M0	--	8310-03-01	--	--	--	--	--	--	--	--	--	--	--	523	--	--	not reported	--	--	Kidney, NOS	not reported	--	--	not reported	--	--	--
TCGA-KIRC	65d56c51-1d58-419e-8c77-a037fc588f5b	TCGA-B8-4621	--	male	1947	black or african american	-23176	alive	--	not hispanic or latino	--	--	--	not reported	not reported	--	--	--	Clear cell adenocarcinoma, NOS	stage i	23176	M0	--	8310-03-01	--	--	--	--	--	--	--	--	--	--	--	788	--	--	not reported	--	--	Kidney, NOS	not reported	--	--	not reported	--	--	--
TCGA-KIRC	b125ff14-4fb4-4f90-8622-fed49bdfe954	TCGA-B8-4622	--	male	1953	white	-21135	alive	--	not hispanic or latino	--	--	--	not reported	not reported	--	--	--	Clear cell adenocarcinoma, NOS	stage iv	21135	M1	--	8310-03-01	--	--	--	--	--	--	--	--	--	--	--	1525	--	--	not reported	--	--	Kidney, NOS	not reported	--	--	not reported	--	--	--
TCGA-KIRC	d62d39f9-c896-4758-a785-e236f0154f14	TCGA-B8-5162	--	male	1948	white	-23008	alive	--	not hispanic or latino	--	--	--	not reported	not reported	--	--	--	Clear cell adenocarcinoma, NOS	stage ii	23008	M0	--	8310-03-01	--	--	--	--	--	--	--	--	--	--	--	36	--	--	not reported	--	--	Kidney, NOS	not reported	--	--	not reported	--	--	--
TCGA-KIRC	d4159990-85dd-4557-be1a-bd03818ea3ea	TCGA-B8-5163	--	female	1947	white	-23293	alive	--	not hispanic or latino	--	--	--	not reported	not reported	--	--	--	Clear cell adenocarcinoma, NOS	stage iii	23293	M0	--	8310-03-01	--	--	--	--	--	--	--	--	--	--	--	822	--	--	not reported	--	--	Kidney, NOS	not reported	--	--	not reported	--	--	--
TCGA-KIRC	89ea18fc-45ec-4e5c-969a-db2112dceefd	TCGA-B8-5165	--	male	1967	white	-15898	alive	--	not hispanic or latino	--	--	--	not reported	not reported	--	--	--	Clear cell adenocarcinoma, NOS	stage i	15898	M0	--	8310-03-01	--	--	--	--	--	--	--	--	--	--	--	737	--	--	not reported	--	--	Kidney, NOS	not reported	--	--	not reported	--	--	--
TCGA-KIRC	59278f79-4f42-4d1c-9007-3958486042fc	TCGA-B8-5550	--	male	1939	white	-25937	alive	--	not hispanic or latino	--	--	--	not reported	not reported	--	--	--	Clear cell adenocarcinoma, NOS	stage iii	25937	M0	--	8310-03-01	--	--	--	--	--	--	--	--	--	--	--	1476	--	--	not reported	--	--	Kidney, NOS	not reported	--	--	not reported	--	--	--
TCGA-KIRC	07aa333c-8bfb-4bdd-ad86-912c099ca0a9	TCGA-B8-5551	--	female	1945	black or african american	-23976	alive	--	not hispanic or latino	--	--	--	not reported	not reported	--	--	--	Clear cell adenocarcinoma, NOS	stage i	23976	M0	--	8310-03-01	--	--	--	--	--	--	--	--	--	--	--	16	--	--	not reported	--	--	Kidney, NOS	not reported	--	--	not reported	--	--	--
TCGA-KIRC	e58f2c7b-d1cc-48f3-a0c9-dcd2b27c37f6	TCGA-B8-5552	--	female	1969	white	-15219	alive	--	not hispanic or latino	--	--	--	not reported	not reported	--	--	--	Clear cell adenocarcinoma, NOS	stage i	15219	M0	--	8310-03-01	--	--	--	--	--	--	--	--	--	--	--	1046	--	--	not reported	--	--	Kidney, NOS	not reported	--	--	not reported	--	--	--
TCGA-KIRC	540cbfa7-d17d-44f5-b67e-f2b9b03827cd	TCGA-B8-A54F	--	female	1963	black or african american	-18028	alive	--	not hispanic or latino	--	--	--	not reported	not reported	--	--	--	Renal cell carcinoma, NOS	stage i	18028	MX	--	8312-03-01	--	--	--	--	--	--	--	--	--	--	--	519	--	--	not reported	--	--	Kidney, NOS	not reported	--	--	not reported	--	--	--
TCGA-KIRC	ea456a1f-6e2c-4b34-ad24-ccd614bd57c9	TCGA-B8-A54G	--	male	1962	black or african american	-18612	alive	--	not hispanic or latino	--	--	--	not reported	not reported	--	--	--	Renal cell carcinoma, NOS	stage i	18612	MX	--	8312-03-01	--	--	--	--	--	--	--	--	--	--	--	53	--	--	not reported	--	--	Kidney, NOS	not reported	--	--	not reported	--	--	--
TCGA-KIRC	3280a078-8841-4c5c-a361-b58bc37b965c	TCGA-B8-A54H	--	female	1943	black or african american	-25243	alive	--	not reported	--	--	--	not reported	not reported	--	--	--	Renal cell carcinoma, NOS	stage ii	25243	MX	--	8312-03-01	--	--	--	--	--	--	--	--	--	--	--	256	--	--	not reported	--	--	Kidney, NOS	not reported	--	--	not reported	--	--	--
TCGA-KIRC	7e620e32-54c5-4f5b-9e18-211516a3eb41	TCGA-B8-A54I	--	male	1964	black or african american	-17722	alive	--	not hispanic or latino	--	--	--	not reported	not reported	--	--	--	Renal cell carcinoma, NOS	stage i	17722	MX	--	8312-03-01	--	--	--	--	--	--	--	--	--	--	--	150	--	--	not reported	--	--	Kidney, NOS	not reported	--	--	not reported	--	--	--
TCGA-KIRC	a2663a86-a006-4867-9e88-2b523df48303	TCGA-B8-A54K	--	male	1951	black or african american	-22627	alive	--	not hispanic or latino	--	--	--	not reported	not reported	--	--	--	Renal cell carcinoma, NOS	stage i	22627	MX	--	8312-03-01	--	--	--	--	--	--	--	--	--	--	--	469	--	--	not reported	--	--	Kidney, NOS	not reported	--	--	not reported	--	--	--
TCGA-KIRC	f2b90375-6806-4833-a927-565674cbf355	TCGA-B8-A7U6	--	female	1959	black or african american	-19803	alive	--	not hispanic or latino	--	--	--	not reported	not reported	--	--	--	Clear cell adenocarcinoma, NOS	stage i	19803	0	--	8310-03-01	--	--	--	--	--	--	--	--	--	--	--	495	--	--	not reported	--	--	Kidney, NOS	not reported	--	--	not reported	--	--	--
TCGA-KIRC	04beccb3-f513-4d60-b57f-a4382e4eeda3	TCGA-B8-A8YJ	--	female	1953	black or african american	-21994	alive	--	not reported	--	--	--	not reported	not reported	--	--	--	Clear cell adenocarcinoma, NOS	stage i	21994	0	--	8310-03-01	--	--	--	--	--	--	--	--	--	--	--	431	--	--	not reported	--	--	Kidney, NOS	not reported	--	--	not reported	--	--	--
TCGA-KIRC	1cdb170b-9765-45ee-9e3e-388d0a419746	TCGA-BP-4158	--	male	1932	white	-25210	alive	--	not reported	--	--	--	not reported	not reported	--	--	--	Clear cell adenocarcinoma, NOS	stage i	25210	M0	--	8310-03-01	--	--	--	--	--	--	--	--	--	--	--	3377	--	--	not reported	--	--	Kidney, NOS	not reported	--	--	not reported	--	--	--
TCGA-KIRC	f8804530-3c83-4787-9467-b18a1c73f610	TCGA-BP-4159	--	male	1932	white	-25677	dead	2601	not reported	2009	--	--	not reported	not reported	--	--	--	Clear cell adenocarcinoma, NOS	stage i	25677	M0	--	8310-03-01	--	--	--	--	--	--	--	--	--	--	--	--	--	--	not reported	--	--	Kidney, NOS	not reported	--	--	not reported	--	--	--
TCGA-KIRC	844d8b94-59b0-4787-97eb-474e3aa3e022	TCGA-BP-4160	--	male	1935	white	-24720	alive	--	hispanic or latino	--	--	--	not reported	not reported	--	--	--	Clear cell adenocarcinoma, NOS	stage iii	24720	M0	--	8310-03-01	--	--	--	--	--	--	--	--	--	--	--	2881	--	--	not reported	--	--	Kidney, NOS	not reported	--	--	not reported	--	--	--
TCGA-KIRC	d9f1bb02-4cb0-4f7c-8f34-ff5f301c6b2c	TCGA-BP-4161	--	male	1928	white	-27119	alive	--	not reported	--	--	--	not reported	not reported	--	--	--	Clear cell adenocarcinoma, NOS	stage i	27119	M0	--	8310-03-01	--	--	--	--	--	--	--	--	--	--	--	2746	--	--	not reported	--	--	Kidney, NOS	not reported	--	--	not reported	--	--	--
TCGA-KIRC	0242658f-a698-4e68-b6e3-2f4aa076763e	TCGA-BP-4162	--	female	1937	white	-23966	alive	--	not reported	--	--	--	not reported	not reported	--	--	--	Clear cell adenocarcinoma, NOS	stage i	23966	M0	--	8310-03-01	--	--	--	--	--	--	--	--	--	--	--	3074	--	--	not reported	--	--	Kidney, NOS	not reported	--	--	not reported	--	--	--
TCGA-KIRC	ba96288c-60d3-4e56-8940-90c5b22d4ddc	TCGA-BP-4164	--	female	1951	white	-18898	dead	992	not reported	2004	--	--	not reported	not reported	--	--	--	Clear cell adenocarcinoma, NOS	stage iii	18898	M0	--	8310-03-01	--	--	--	--	--	--	--	--	--	--	--	--	--	--	not reported	--	--	Kidney, NOS	not reported	--	--	not reported	--	--	--
TCGA-KIRC	3c1b6de7-c45f-4d86-be4b-a72ca7ca7cf9	TCGA-BP-4165	--	female	1938	white	-23685	alive	--	not reported	--	--	--	not reported	not reported	--	--	--	Clear cell adenocarcinoma, NOS	stage i	23685	M0	--	8310-03-01	--	--	--	--	--	--	--	--	--	--	--	3037	--	--	not reported	--	--	Kidney, NOS	not reported	--	--	not reported	--	--	--
TCGA-KIRC	3c4ed50e-d00e-4ffe-b426-41dfdcb7327a	TCGA-BP-4166	--	male	1934	white	-25300	alive	--	not reported	--	--	--	not reported	not reported	--	--	--	Clear cell adenocarcinoma, NOS	stage iii	25300	M0	--	8310-03-01	--	--	--	--	--	--	--	--	--	--	--	13	--	--	not reported	--	--	Kidney, NOS	not reported	--	--	not reported	--	--	--
TCGA-KIRC	e7bbc8a9-b63b-4967-812b-f9280a5e181e	TCGA-BP-4167	--	male	1944	white	-21901	alive	--	not reported	--	--	--	not reported	not reported	--	--	--	Clear cell adenocarcinoma, NOS	stage iii	21901	M0	--	8310-03-01	--	--	--	--	--	--	--	--	--	--	--	2718	--	--	not reported	--	--	Kidney, NOS	not reported	--	--	not reported	--	--	--
TCGA-KIRC	3f05a719-e81e-4f0c-a5c1-f1733b7aba11	TCGA-BP-4169	--	female	1927	white	-27778	dead	701	not reported	2004	--	--	not reported	not reported	--	--	--	Clear cell adenocarcinoma, NOS	stage ii	27778	M0	--	8310-03-01	--	--	--	--	--	--	--	--	--	--	--	--	--	--	not reported	--	--	Kidney, NOS	not reported	--	--	not reported	--	--	--
TCGA-KIRC	830626c5-891f-4b62-bc0a-68fbfb8bc2a8	TCGA-BP-4174	--	male	1955	white	-18054	alive	--	not reported	--	--	--	not reported	not reported	--	--	--	Clear cell adenocarcinoma, NOS	stage ii	18054	M0	--	8310-03-01	--	--	--	--	--	--	--	--	--	--	--	1879	--	--	not reported	--	--	Kidney, NOS	not reported	--	--	not reported	--	--	--
TCGA-KIRC	ff9328d5-d604-4276-866c-2d44ef3b2403	TCGA-BP-4176	--	male	1941	white	-23609	alive	--	not reported	--	--	--	not reported	not reported	--	--	--	Clear cell adenocarcinoma, NOS	stage i	23609	M0	--	8310-03-01	--	--	--	--	--	--	--	--	--	--	--	1955	--	--	not reported	--	--	Kidney, NOS	not reported	--	--	not reported	--	--	--
TCGA-KIRC	c15d5920-4f59-4e31-9ba6-1f2de8ab5d5d	TCGA-BP-4177	--	male	1940	white	-23955	alive	--	not hispanic or latino	--	--	--	not reported	not reported	--	--	--	Clear cell adenocarcinoma, NOS	stage i	23955	M0	--	8310-03-01	--	--	--	--	--	--	--	--	--	--	--	1670	--	--	not reported	--	--	Kidney, NOS	not reported	--	--	not reported	--	--	--
TCGA-KIRC	b81243b3-5130-4268-9883-07e547b8d728	TCGA-BP-4325	--	female	1937	white	-23588	alive	--	not reported	--	--	--	not reported	not reported	--	--	--	Clear cell adenocarcinoma, NOS	stage i	23588	M0	--	8310-03-01	--	--	--	--	--	--	--	--	--	--	--	2964	--	--	not reported	--	--	Kidney, NOS	not reported	--	--	not reported	--	--	--
TCGA-KIRC	fdfaf862-46a4-4792-8487-810c6d1f9093	TCGA-BP-4330	--	female	1942	black or african american	-22239	alive	--	hispanic or latino	--	--	--	not reported	not reported	--	--	--	Clear cell adenocarcinoma, NOS	stage iii	22239	M0	--	8310-03-01	--	--	--	--	--	--	--	--	--	--	--	1888	--	--	not reported	--	--	Kidney, NOS	not reported	--	--	not reported	--	--	--
TCGA-KIRC	39867756-0ef0-4408-a0e1-c85ae7adb8ee	TCGA-BP-4331	--	male	1950	white	-19022	dead	2454	not hispanic or latino	2008	--	--	not reported	not reported	--	--	--	Clear cell adenocarcinoma, NOS	stage i	19022	M0	--	8310-03-01	--	--	--	--	--	--	--	--	--	--	--	--	--	--	not reported	--	--	Kidney, NOS	not reported	--	--	not reported	--	--	--
TCGA-KIRC	e9847c37-0d93-47bf-b669-c7f7a1abfa88	TCGA-BP-4332	--	male	1966	white	-13404	alive	--	not reported	--	--	--	not reported	not reported	--	--	--	Clear cell adenocarcinoma, NOS	stage iii	13404	M0	--	8310-03-01	--	--	--	--	--	--	--	--	--	--	--	1133	--	--	not reported	--	--	Kidney, NOS	not reported	--	--	not reported	--	--	--
TCGA-KIRC	e5eca191-f585-490d-81e3-9cced1047093	TCGA-BP-4334	--	male	1947	white	-20609	dead	645	not reported	--	--	--	not reported	not reported	--	--	--	Clear cell adenocarcinoma, NOS	stage iii	20609	M0	--	8310-03-01	--	--	--	--	--	--	--	--	--	--	--	645	--	--	not reported	--	--	Kidney, NOS	not reported	--	--	not reported	--	--	--
TCGA-KIRC	2913faf2-d722-4993-8e9a-3c4cc1f5d82b	TCGA-BP-4337	--	female	1927	white	-27906	dead	2	not reported	2003	--	--	not reported	not reported	--	--	--	Clear cell adenocarcinoma, NOS	stage iii	27906	M0	--	8310-03-01	--	--	--	--	--	--	--	--	--	--	--	--	--	--	not reported	--	--	Kidney, NOS	not reported	--	--	not reported	--	--	--
TCGA-KIRC	4978eb8d-4a38-470b-9a00-6dd3aada1aa9	TCGA-BP-4338	--	male	1960	white	-15891	alive	--	not reported	--	--	--	not reported	not reported	--	--	--	Clear cell adenocarcinoma, NOS	stage i	15891	M0	--	8310-03-01	--	--	--	--	--	--	--	--	--	--	--	2859	--	--	not reported	--	--	Kidney, NOS	not reported	--	--	not reported	--	--	--
TCGA-KIRC	8be7d2e2-1504-49d0-bbdd-893d3d12e072	TCGA-BP-4341	--	male	1936	white	-24727	dead	1589	not reported	2007	--	--	not reported	not reported	--	--	--	Clear cell adenocarcinoma, NOS	stage iii	24727	M0	--	8310-03-01	--	--	--	--	--	--	--	--	--	--	--	--	--	--	not reported	--	--	Kidney, NOS	not reported	--	--	not reported	--	--	--
TCGA-KIRC	c0e26587-3191-4396-a20b-da9e7de213f4	TCGA-BP-4342	--	male	1924	white	-29032	dead	2256	not reported	2009	--	--	not reported	not reported	--	--	--	Clear cell adenocarcinoma, NOS	stage ii	29032	M0	--	8310-03-01	--	--	--	--	--	--	--	--	--	--	--	--	--	--	not reported	--	--	Kidney, NOS	not reported	--	--	not reported	--	--	--
TCGA-KIRC	513a4de3-427d-4823-8644-b6faf69a137f	TCGA-BP-4344	--	female	1931	white	-27561	alive	--	not reported	--	--	--	not reported	not reported	--	--	--	Clear cell adenocarcinoma, NOS	stage i	27561	M0	--	8310-03-01	--	--	--	--	--	--	--	--	--	--	--	1666	--	--	not reported	--	--	Kidney, NOS	not reported	--	--	not reported	--	--	--
TCGA-KIRC	8958c2bf-b986-4c07-98d2-09dfe2375a14	TCGA-BP-4345	--	male	1944	white	-22879	alive	--	not hispanic or latino	--	--	--	not reported	not reported	--	--	--	Clear cell adenocarcinoma, NOS	stage iii	22879	M0	--	8310-03-01	--	--	--	--	--	--	--	--	--	--	--	1516	--	--	not reported	--	--	Kidney, NOS	not reported	--	--	not reported	--	--	--
TCGA-KIRC	57959b73-534d-450c-b09d-f70ef1ffee25	TCGA-BP-4346	--	male	1949	white	-21057	dead	1493	not reported	2010	--	--	not reported	not reported	--	--	--	Clear cell adenocarcinoma, NOS	stage iii	21057	M0	--	8310-03-01	--	--	--	--	--	--	--	--	--	--	--	--	--	--	not reported	--	--	Kidney, NOS	not reported	--	--	not reported	--	--	--
TCGA-KIRC	a9f73fb6-fc3e-4c0d-ace3-36cd7dcee256	TCGA-BP-4347	--	male	1932	white	-27146	alive	--	not hispanic or latino	--	--	--	not reported	not reported	--	--	--	Clear cell adenocarcinoma, NOS	stage iii	27146	M0	--	8310-03-01	--	--	--	--	--	--	--	--	--	--	--	1367	--	--	not reported	--	--	Kidney, NOS	not reported	--	--	not reported	--	--	--
TCGA-KIRC	f72defb3-87ca-4efd-9dc7-d2068533fd98	TCGA-BP-4349	--	female	1938	white	-24853	alive	--	not reported	--	--	--	not reported	not reported	--	--	--	Clear cell adenocarcinoma, NOS	stage i	24853	M0	--	8310-03-01	--	--	--	--	--	--	--	--	--	--	--	372	--	--	not reported	--	--	Kidney, NOS	not reported	--	--	not reported	--	--	--
TCGA-KIRC	a8e0f80a-7049-4b5a-af21-cb6421286271	TCGA-BP-4351	--	female	1955	white	-18662	alive	--	not reported	--	--	--	not reported	not reported	--	--	--	Clear cell adenocarcinoma, NOS	stage iii	18662	M0	--	8310-03-01	--	--	--	--	--	--	--	--	--	--	--	970	--	--	not reported	--	--	Kidney, NOS	not reported	--	--	not reported	--	--	--
TCGA-KIRC	037c691e-6320-451b-9276-78459f1b705c	TCGA-BP-4352	--	female	1933	white	-27253	dead	344	not hispanic or latino	2007	--	--	not reported	not reported	--	--	--	Clear cell adenocarcinoma, NOS	stage iv	27253	M1	--	8310-03-01	--	--	--	--	--	--	--	--	--	--	--	--	--	--	not reported	--	--	Kidney, NOS	not reported	--	--	not reported	--	--	--
TCGA-KIRC	d9208e7b-0b47-43ff-a4e8-d4e591e286c4	TCGA-BP-4354	--	male	1966	white	-14973	dead	1034	not reported	2008	--	--	not reported	not reported	--	--	--	Clear cell adenocarcinoma, NOS	stage iv	14973	M1	--	8310-03-01	--	--	--	--	--	--	--	--	--	--	--	--	--	--	not reported	--	--	Kidney, NOS	not reported	--	--	not reported	--	--	--
TCGA-KIRC	eeacbbdc-68c9-4dce-8999-e1dbcb86c14a	TCGA-BP-4355	--	female	1949	white	-21642	dead	953	not reported	2010	--	--	not reported	not reported	--	--	--	Clear cell adenocarcinoma, NOS	stage iii	21642	M0	--	8310-03-01	--	--	--	--	--	--	--	--	--	--	--	--	--	--	not reported	--	--	Kidney, NOS	not reported	--	--	not reported	--	--	--
TCGA-KIRC	9ecdde9c-2179-4830-bd10-c4fa40f26066	TCGA-BP-4756	--	female	1941	asian	-23001	alive	--	not reported	--	--	--	not reported	not reported	--	--	--	Clear cell adenocarcinoma, NOS	stage i	23001	M0	--	8310-03-01	--	--	--	--	--	--	--	--	--	--	--	374	--	--	not reported	--	--	Kidney, NOS	not reported	--	--	not reported	--	--	--
TCGA-KIRC	44143697-c4b3-4051-9594-d53131c05889	TCGA-BP-4758	--	male	1964	white	-14824	alive	--	not reported	--	--	--	not reported	not reported	--	--	--	Clear cell adenocarcinoma, NOS	stage i	14824	M0	--	8310-03-01	--	--	--	--	--	--	--	--	--	--	--	2208	--	--	not reported	--	--	Kidney, NOS	not reported	--	--	not reported	--	--	--
TCGA-KIRC	4cfe4f31-f62c-423a-8b9f-17f455b15313	TCGA-BP-4760	--	male	1935	black or african american	-25268	alive	--	not hispanic or latino	--	--	--	not reported	not reported	--	--	--	Clear cell adenocarcinoma, NOS	stage i	25268	M0	--	8310-03-01	--	--	--	--	--	--	--	--	--	--	--	2361	--	--	not reported	--	--	Kidney, NOS	not reported	--	--	not reported	--	--	--
TCGA-KIRC	270c9a0b-d71a-4d4e-8686-f183412159f2	TCGA-BP-4761	--	male	1947	white	-21019	alive	--	not reported	--	--	--	not reported	not reported	--	--	--	Clear cell adenocarcinoma, NOS	stage iii	21019	M0	--	8310-03-01	--	--	--	--	--	--	--	--	--	--	--	182	--	--	not reported	--	--	Kidney, NOS	not reported	--	--	not reported	--	--	--
TCGA-KIRC	2dde6b93-11a8-424f-9b54-b1a81cd26895	TCGA-BP-4762	--	male	1962	white	-15358	dead	1343	not reported	2007	--	--	not reported	not reported	--	--	--	Clear cell adenocarcinoma, NOS	stage i	15358	M0	--	8310-03-01	--	--	--	--	--	--	--	--	--	--	--	--	--	--	not reported	--	--	Kidney, NOS	not reported	--	--	not reported	--	--	--
TCGA-KIRC	6dc3788e-570f-4f39-9951-dcc7ad51e1f2	TCGA-BP-4765	--	male	1961	white	-15814	alive	--	not reported	--	--	--	not reported	not reported	--	--	--	Clear cell adenocarcinoma, NOS	stage i	15814	M0	--	8310-03-01	--	--	--	--	--	--	--	--	--	--	--	2184	--	--	not reported	--	--	Kidney, NOS	not reported	--	--	not reported	--	--	--
TCGA-KIRC	8d5d69a4-7733-4dec-8ddb-64c79c2c956e	TCGA-BP-4768	--	female	1933	white	-26474	alive	--	not reported	--	--	--	not reported	not reported	--	--	--	Clear cell adenocarcinoma, NOS	stage i	26474	M0	--	8310-03-01	--	--	--	--	--	--	--	--	--	--	--	400	--	--	not reported	--	--	Kidney, NOS	not reported	--	--	not reported	--	--	--
TCGA-KIRC	c3cc716b-1b9c-4e73-9a40-f1f891a17c2d	TCGA-BP-4770	--	female	1932	white	-26824	dead	329	not reported	2005	--	--	not reported	not reported	--	--	--	Clear cell adenocarcinoma, NOS	stage iv	26824	M0	--	8310-03-01	--	--	--	--	--	--	--	--	--	--	--	--	--	--	not reported	--	--	Kidney, NOS	not reported	--	--	not reported	--	--	--
TCGA-KIRC	31201e73-a922-4acd-b859-fa2f9ba0af93	TCGA-BP-4771	--	male	1943	white	-22771	dead	162	not reported	2005	--	--	not reported	not reported	--	--	--	Clear cell adenocarcinoma, NOS	stage iv	22771	M1	--	8310-03-01	--	--	--	--	--	--	--	--	--	--	--	--	--	--	not reported	--	--	Kidney, NOS	not reported	--	--	not reported	--	--	--
TCGA-KIRC	a50fe35a-c05b-42a4-a1ce-dac49d6e761d	TCGA-BP-4774	--	female	1948	white	-20827	alive	--	not reported	--	--	--	not reported	not reported	--	--	--	Clear cell adenocarcinoma, NOS	stage i	20827	M0	--	8310-03-01	--	--	--	--	--	--	--	--	--	--	--	1885	--	--	not reported	--	--	Kidney, NOS	not reported	--	--	not reported	--	--	--
TCGA-KIRC	c22d25c2-b836-4b91-8f4f-2062be002232	TCGA-BP-4775	--	female	1950	white	-20369	alive	--	not reported	--	--	--	not reported	not reported	--	--	--	Clear cell adenocarcinoma, NOS	stage i	20369	M0	--	8310-03-01	--	--	--	--	--	--	--	--	--	--	--	1843	--	--	not reported	--	--	Kidney, NOS	not reported	--	--	not reported	--	--	--
TCGA-KIRC	b15f495d-8598-4404-86b0-519df0f2d504	TCGA-BP-4776	--	male	1953	white	-19143	alive	--	not reported	--	--	--	not reported	not reported	--	--	--	Clear cell adenocarcinoma, NOS	stage i	19143	M0	--	8310-03-01	--	--	--	--	--	--	--	--	--	--	--	411	--	--	not reported	--	--	Kidney, NOS	not reported	--	--	not reported	--	--	--
TCGA-KIRC	6fbf13b2-614b-4c61-824b-81ae25daae31	TCGA-BP-4777	--	male	1959	white	-17133	alive	--	not hispanic or latino	--	--	--	not reported	not reported	--	--	--	Clear cell adenocarcinoma, NOS	stage i	17133	M0	--	8310-03-01	--	--	--	--	--	--	--	--	--	--	--	1731	--	--	not reported	--	--	Kidney, NOS	not reported	--	--	not reported	--	--	--
TCGA-KIRC	80c4fc5b-dc7d-4308-8c81-6e83625963b5	TCGA-BP-4781	--	male	1927	white	-28701	alive	--	not reported	--	--	--	not reported	not reported	--	--	--	Clear cell adenocarcinoma, NOS	stage i	28701	M0	--	8310-03-01	--	--	--	--	--	--	--	--	--	--	--	2080	--	--	not reported	--	--	Kidney, NOS	not reported	--	--	not reported	--	--	--
TCGA-KIRC	dd35edfd-ee6c-461f-b2a6-2dff8324117c	TCGA-BP-4797	--	male	1973	white	-12508	alive	--	not hispanic or latino	--	--	--	not reported	not reported	--	--	--	Clear cell adenocarcinoma, NOS	stage iii	12508	M0	--	8310-03-01	--	--	--	--	--	--	--	--	--	--	--	1107	--	--	not reported	--	--	Kidney, NOS	not reported	--	--	not reported	--	--	--
TCGA-KIRC	382291d3-6f93-4150-ae13-3d5951a39333	TCGA-BP-4803	--	male	1929	white	-28934	alive	--	not reported	--	--	--	not reported	not reported	--	--	--	Clear cell adenocarcinoma, NOS	stage iii	28934	M0	--	8310-03-01	--	--	--	--	--	--	--	--	--	--	--	204	--	--	not reported	--	--	Kidney, NOS	not reported	--	--	not reported	--	--	--
TCGA-KIRC	b81998f2-b3ff-4976-bc1c-8d38a68efa1d	TCGA-BP-4804	--	male	1949	white	-21727	alive	--	not hispanic or latino	--	--	--	not reported	not reported	--	--	--	Clear cell adenocarcinoma, NOS	stage i	21727	M0	--	8310-03-01	--	--	--	--	--	--	--	--	--	--	--	1459	--	--	not reported	--	--	Kidney, NOS	not reported	--	--	not reported	--	--	--
TCGA-KIRC	5003a0cb-1a60-4c2e-b7f7-6e9245c66968	TCGA-BP-4959	--	male	1954	white	-17968	alive	--	not hispanic or latino	--	--	--	not reported	not reported	--	--	--	Clear cell adenocarcinoma, NOS	stage i	17968	M0	--	8310-03-01	--	--	--	--	--	--	--	--	--	--	--	2660	--	--	not reported	--	--	Kidney, NOS	not reported	--	--	not reported	--	--	--
TCGA-KIRC	0d88e6ab-cf1d-4888-878b-0ac7d687c4cc	TCGA-BP-4960	--	male	1958	white	-17099	alive	--	not reported	--	--	--	not reported	not reported	--	--	--	Clear cell adenocarcinoma, NOS	stage ii	17099	M0	--	8310-03-01	--	--	--	--	--	--	--	--	--	--	--	2172	--	--	not reported	--	--	Kidney, NOS	not reported	--	--	not reported	--	--	--
TCGA-KIRC	d23d354d-04b0-4ff4-bd83-6a2d1ecf3b47	TCGA-BP-4961	--	male	1958	white	-17284	alive	--	not reported	--	--	--	not reported	not reported	--	--	--	Clear cell adenocarcinoma, NOS	stage i	17284	M0	--	8310-03-01	--	--	--	--	--	--	--	--	--	--	--	1935	--	--	not reported	--	--	Kidney, NOS	not reported	--	--	not reported	--	--	--
TCGA-KIRC	db601d82-e2e7-469c-91da-3dbfcb477326	TCGA-BP-4964	--	female	1951	white	-20084	alive	--	not reported	--	--	--	not reported	not reported	--	--	--	Clear cell adenocarcinoma, NOS	stage i	20084	M0	--	8310-03-01	--	--	--	--	--	--	--	--	--	--	--	1862	--	--	not reported	--	--	Kidney, NOS	not reported	--	--	not reported	--	--	--
TCGA-KIRC	1e417b93-837d-4110-9090-239eb82c3e20	TCGA-BP-4968	--	male	1966	white	-14651	alive	--	not hispanic or latino	--	--	--	not reported	not reported	--	--	--	Clear cell adenocarcinoma, NOS	stage i	14651	M0	--	8310-03-01	--	--	--	--	--	--	--	--	--	--	--	1746	--	--	not reported	--	--	Kidney, NOS	not reported	--	--	not reported	--	--	--
TCGA-KIRC	3b064b7e-c3cf-4fc3-844e-301a51737e35	TCGA-BP-4969	--	female	1943	white	-23216	alive	--	not hispanic or latino	--	--	--	not reported	not reported	--	--	--	Clear cell adenocarcinoma, NOS	stage i	23216	M0	--	8310-03-01	--	--	--	--	--	--	--	--	--	--	--	1794	--	--	not reported	--	--	Kidney, NOS	not reported	--	--	not reported	--	--	--
TCGA-KIRC	c01afa58-af3f-40f1-b4fe-36909ae3871e	TCGA-BP-4970	--	male	1962	asian	-16228	alive	--	not reported	--	--	--	not reported	not reported	--	--	--	Clear cell adenocarcinoma, NOS	stage iii	16228	M0	--	8310-03-01	--	--	--	--	--	--	--	--	--	--	--	433	--	--	not reported	--	--	Kidney, NOS	not reported	--	--	not reported	--	--	--
TCGA-KIRC	e173c4ba-9c08-4ce6-b46c-1673b5af9e2d	TCGA-BP-4971	--	male	1966	white	-14675	alive	--	not reported	--	--	--	not reported	not reported	--	--	--	Clear cell adenocarcinoma, NOS	stage iii	14675	M0	--	8310-03-01	--	--	--	--	--	--	--	--	--	--	--	1487	--	--	not reported	--	--	Kidney, NOS	not reported	--	--	not reported	--	--	--
TCGA-KIRC	cdd8eb5c-bda8-4961-9db4-72e0c4907e95	TCGA-BP-4973	--	male	1959	white	-17461	alive	--	not reported	--	--	--	not reported	not reported	--	--	--	Clear cell adenocarcinoma, NOS	stage iii	17461	M0	--	8310-03-01	--	--	--	--	--	--	--	--	--	--	--	1384	--	--	not reported	--	--	Kidney, NOS	not reported	--	--	not reported	--	--	--
TCGA-KIRC	d6625c4d-cd1c-4c62-8100-e8b2a49ce3ad	TCGA-BP-4974	--	male	1948	white	-21310	dead	211	not reported	2006	--	--	not reported	not reported	--	--	--	Clear cell adenocarcinoma, NOS	stage iv	21310	M1	--	8310-03-01	--	--	--	--	--	--	--	--	--	--	--	--	--	--	not reported	--	--	Kidney, NOS	not reported	--	--	not reported	--	--	--
TCGA-KIRC	d97ac1d1-fc06-4e9b-b3ad-415582ff66f1	TCGA-BP-4975	--	male	1966	white	-14710	alive	--	not hispanic or latino	--	--	--	not reported	not reported	--	--	--	Clear cell adenocarcinoma, NOS	stage i	14710	M0	--	8310-03-01	--	--	--	--	--	--	--	--	--	--	--	1433	--	--	not reported	--	--	Kidney, NOS	not reported	--	--	not reported	--	--	--
TCGA-KIRC	2375ef64-8212-4ad4-97e8-bfa6d1db430f	TCGA-BP-4976	--	male	1929	white	-28380	alive	--	not reported	--	--	--	not reported	not reported	--	--	--	Clear cell adenocarcinoma, NOS	stage i	28380	M0	--	8310-03-01	--	--	--	--	--	--	--	--	--	--	--	1632	--	--	not reported	--	--	Kidney, NOS	not reported	--	--	not reported	--	--	--
TCGA-KIRC	cc353686-e2b6-46a1-8095-48e2bc44b11f	TCGA-BP-4977	--	male	1949	white	-20950	alive	--	not reported	--	--	--	not reported	not reported	--	--	--	Clear cell adenocarcinoma, NOS	stage i	20950	M0	--	8310-03-01	--	--	--	--	--	--	--	--	--	--	--	454	--	--	not reported	--	--	Kidney, NOS	not reported	--	--	not reported	--	--	--
TCGA-KIRC	ce0ab696-4e50-4b05-a7e5-5191c257bfbe	TCGA-BP-4981	--	female	1931	white	-27676	dead	1097	not reported	2009	--	--	not reported	not reported	--	--	--	Clear cell adenocarcinoma, NOS	stage iii	27676	M0	--	8310-03-01	--	--	--	--	--	--	--	--	--	--	--	--	--	--	not reported	--	--	Kidney, NOS	not reported	--	--	not reported	--	--	--
TCGA-KIRC	fae200ed-78e7-4d2d-82b5-aee63fc54d25	TCGA-BP-4982	--	male	1964	white	-15451	alive	--	not reported	--	--	--	not reported	not reported	--	--	--	Clear cell adenocarcinoma, NOS	stage i	15451	M0	--	8310-03-01	--	--	--	--	--	--	--	--	--	--	--	1014	--	--	not reported	--	--	Kidney, NOS	not reported	--	--	not reported	--	--	--
TCGA-KIRC	c285ada3-fd49-46a5-882f-b6c352572e2a	TCGA-BP-4985	--	male	1934	white	-26611	dead	952	not reported	2008	--	--	not reported	not reported	--	--	--	Clear cell adenocarcinoma, NOS	stage iii	26611	M0	--	8310-03-01	--	--	--	--	--	--	--	--	--	--	--	--	--	--	not reported	--	--	Kidney, NOS	not reported	--	--	not reported	--	--	--
TCGA-KIRC	ccd44d97-f0d5-47cd-9c12-af458c750d23	TCGA-BP-4986	--	male	1931	white	-27612	alive	--	hispanic or latino	--	--	--	not reported	not reported	--	--	--	Clear cell adenocarcinoma, NOS	stage i	27612	M0	--	8310-03-01	--	--	--	--	--	--	--	--	--	--	--	785	--	--	not reported	--	--	Kidney, NOS	not reported	--	--	not reported	--	--	--
TCGA-KIRC	aebe37c4-5b37-41f3-ade3-46e41bad8eab	TCGA-BP-4987	--	female	1965	asian	-15041	alive	--	not reported	--	--	--	not reported	not reported	--	--	--	Clear cell adenocarcinoma, NOS	stage i	15041	M0	--	8310-03-01	--	--	--	--	--	--	--	--	--	--	--	1124	--	--	not reported	--	--	Kidney, NOS	not reported	--	--	not reported	--	--	--
TCGA-KIRC	dc2208d9-dcb3-47ff-826b-676f199b8ccd	TCGA-BP-4989	--	male	1949	white	-21382	alive	--	not reported	--	--	--	not reported	not reported	--	--	--	Clear cell adenocarcinoma, NOS	stage iii	21382	M0	--	8310-03-01	--	--	--	--	--	--	--	--	--	--	--	118	--	--	not reported	--	--	Kidney, NOS	not reported	--	--	not reported	--	--	--
TCGA-KIRC	89500416-1a5e-4f52-a1b9-6394f3943e4d	TCGA-BP-4991	--	male	1953	white	-19739	alive	--	not reported	--	--	--	not reported	not reported	--	--	--	Clear cell adenocarcinoma, NOS	stage i	19739	M0	--	8310-03-01	--	--	--	--	--	--	--	--	--	--	--	1413	--	--	not reported	--	--	Kidney, NOS	not reported	--	--	not reported	--	--	--
TCGA-KIRC	a5790b81-5001-4d1a-97ad-0ec9fc658f44	TCGA-BP-4992	--	male	1941	white	-24438	alive	--	not reported	--	--	--	not reported	not reported	--	--	--	Clear cell adenocarcinoma, NOS	stage i	24438	M0	--	8310-03-01	--	--	--	--	--	--	--	--	--	--	--	501	--	--	not reported	--	--	Kidney, NOS	not reported	--	--	not reported	--	--	--
TCGA-KIRC	6ccd4657-ffa3-4e82-929f-9a7366a89578	TCGA-BP-4993	--	male	1949	white	-21407	alive	--	not reported	--	--	--	not reported	not reported	--	--	--	Clear cell adenocarcinoma, NOS	stage i	21407	M0	--	8310-03-01	--	--	--	--	--	--	--	--	--	--	--	177	--	--	not reported	--	--	Kidney, NOS	not reported	--	--	not reported	--	--	--
TCGA-KIRC	82f069c4-7928-4b7b-8a42-114db7de0501	TCGA-BP-4994	--	male	1953	white	-19946	alive	--	not reported	--	--	--	not reported	not reported	--	--	--	Clear cell adenocarcinoma, NOS	stage i	19946	M0	--	8310-03-01	--	--	--	--	--	--	--	--	--	--	--	1308	--	--	not reported	--	--	Kidney, NOS	not reported	--	--	not reported	--	--	--
TCGA-KIRC	9245a557-01ea-4446-b9e9-313f6ab18834	TCGA-BP-4995	--	male	1939	white	-24850	alive	--	not hispanic or latino	--	--	--	not reported	not reported	--	--	--	Clear cell adenocarcinoma, NOS	stage i	24850	M0	--	8310-03-01	--	--	--	--	--	--	--	--	--	--	--	1371	--	--	not reported	--	--	Kidney, NOS	not reported	--	--	not reported	--	--	--
TCGA-KIRC	9aa63985-16ba-4d43-a6ec-4a35f2ff6513	TCGA-BP-4999	--	male	1951	white	-20518	alive	--	not hispanic or latino	--	--	--	not reported	not reported	--	--	--	Clear cell adenocarcinoma, NOS	stage i	20518	M0	--	8310-03-01	--	--	--	--	--	--	--	--	--	--	--	1266	--	--	not reported	--	--	Kidney, NOS	not reported	--	--	not reported	--	--	--
TCGA-KIRC	2a2f168c-f93a-4e83-8df2-93a3e7bc06a0	TCGA-BP-5000	--	male	1967	white	-14868	alive	--	not reported	--	--	--	not reported	not reported	--	--	--	Clear cell adenocarcinoma, NOS	stage i	14868	M0	--	8310-03-01	--	--	--	--	--	--	--	--	--	--	--	563	--	--	not reported	--	--	Kidney, NOS	not reported	--	--	not reported	--	--	--
TCGA-KIRC	d6ea5cec-97bf-4c0f-85bf-293d463b0586	TCGA-BP-5001	--	female	1964	white	-15858	alive	--	not reported	--	--	--	not reported	not reported	--	--	--	Clear cell adenocarcinoma, NOS	stage i	15858	M0	--	8310-03-01	--	--	--	--	--	--	--	--	--	--	--	1177	--	--	not reported	--	--	Kidney, NOS	not reported	--	--	not reported	--	--	--
TCGA-KIRC	3cfe743c-f02e-42bf-a170-9d8b8a514d10	TCGA-BP-5004	--	male	1954	white	-19383	alive	--	not reported	--	--	--	not reported	not reported	--	--	--	Clear cell adenocarcinoma, NOS	stage i	19383	M0	--	8310-03-01	--	--	--	--	--	--	--	--	--	--	--	1126	--	--	not reported	--	--	Kidney, NOS	not reported	--	--	not reported	--	--	--
TCGA-KIRC	b5f51cf6-1013-4d4b-aff1-4b7e8f6afd9c	TCGA-BP-5006	--	male	1946	white	-22324	alive	--	not reported	--	--	--	not reported	not reported	--	--	--	Clear cell adenocarcinoma, NOS	stage i	22324	M0	--	8310-03-01	--	--	--	--	--	--	--	--	--	--	--	840	--	--	not reported	--	--	Kidney, NOS	not reported	--	--	not reported	--	--	--
TCGA-KIRC	e548aeb2-04ca-48f8-af8d-8acb745748fc	TCGA-BP-5007	--	male	1962	white	-16793	alive	--	not hispanic or latino	--	--	--	not reported	not reported	--	--	--	Clear cell adenocarcinoma, NOS	stage ii	16793	M0	--	8310-03-01	--	--	--	--	--	--	--	--	--	--	--	1140	--	--	not reported	--	--	Kidney, NOS	not reported	--	--	not reported	--	--	--
TCGA-KIRC	b472c982-f024-4e09-8326-071ee35ea55c	TCGA-BP-5008	--	male	1961	white	-17008	alive	--	not reported	--	--	--	not reported	not reported	--	--	--	Clear cell adenocarcinoma, NOS	stage i	17008	M0	--	8310-03-01	--	--	--	--	--	--	--	--	--	--	--	1071	--	--	not reported	--	--	Kidney, NOS	not reported	--	--	not reported	--	--	--
TCGA-KIRC	57070e5b-0eb5-44b7-abb3-3007fa34543a	TCGA-BP-5009	--	male	1955	white	-19052	dead	1092	not hispanic or latino	2009	--	--	not reported	not reported	--	--	--	Clear cell adenocarcinoma, NOS	stage i	19052	M0	--	8310-03-01	--	--	--	--	--	--	--	--	--	--	--	--	--	--	not reported	--	--	Kidney, NOS	not reported	--	--	not reported	--	--	--
TCGA-KIRC	9f5c0a43-d222-484a-9249-d288387dd7a1	TCGA-BP-5010	--	male	1944	white	-23130	dead	878	not hispanic or latino	2009	--	--	not reported	not reported	--	--	--	Clear cell adenocarcinoma, NOS	stage iii	23130	M0	--	8310-03-01	--	--	--	--	--	--	--	--	--	--	--	--	--	--	not reported	--	--	Kidney, NOS	not reported	--	--	not reported	--	--	--
TCGA-KIRC	2d7e2ae4-09ba-40af-82ce-66ac7dbd4831	TCGA-BP-5169	--	male	1934	white	-25615	alive	--	not reported	--	--	--	not reported	not reported	--	--	--	Clear cell adenocarcinoma, NOS	stage i	25615	M0	--	8310-03-01	--	--	--	--	--	--	--	--	--	--	--	193	--	--	not reported	--	--	Kidney, NOS	not reported	--	--	not reported	--	--	--
TCGA-KIRC	265f1d03-fa56-4f9a-a1d2-33f123558729	TCGA-BP-5175	--	male	1944	white	-21949	alive	--	not reported	--	--	--	not reported	not reported	--	--	--	Clear cell adenocarcinoma, NOS	stage i	21949	M0	--	8310-03-01	--	--	--	--	--	--	--	--	--	--	--	932	--	--	not reported	--	--	Kidney, NOS	not reported	--	--	not reported	--	--	--
TCGA-KIRC	9490cd1e-be30-45d3-b1ea-42c157d5f49d	TCGA-BP-5176	--	female	1926	white	-28727	dead	1590	not reported	2008	--	--	not reported	not reported	--	--	--	Clear cell adenocarcinoma, NOS	stage i	28727	M0	--	8310-03-01	--	--	--	--	--	--	--	--	--	--	--	--	--	--	not reported	--	--	Kidney, NOS	not reported	--	--	not reported	--	--	--
TCGA-KIRC	315b6dea-02c6-44dc-9788-a72f78fae815	TCGA-BP-5182	--	male	1951	white	-20597	alive	--	not hispanic or latino	--	--	--	not reported	not reported	--	--	--	Clear cell adenocarcinoma, NOS	stage i	20597	M0	--	8310-03-01	--	--	--	--	--	--	--	--	--	--	--	1165	--	--	not reported	--	--	Kidney, NOS	not reported	--	--	not reported	--	--	--
TCGA-KIRC	64aa0dd1-a80e-401e-96df-60d121d2cbec	TCGA-BP-5183	--	male	1950	white	-20881	alive	--	hispanic or latino	--	--	--	not reported	not reported	--	--	--	Clear cell adenocarcinoma, NOS	stage iii	20881	M0	--	8310-03-01	--	--	--	--	--	--	--	--	--	--	--	1291	--	--	not reported	--	--	Kidney, NOS	not reported	--	--	not reported	--	--	--
TCGA-KIRC	d3638a1f-da14-4c78-bb53-a5cc30850cbe	TCGA-BP-5185	--	male	1951	white	-20470	alive	--	not reported	--	--	--	not reported	not reported	--	--	--	Clear cell adenocarcinoma, NOS	stage i	20470	M0	--	8310-03-01	--	--	--	--	--	--	--	--	--	--	--	1132	--	--	not reported	--	--	Kidney, NOS	not reported	--	--	not reported	--	--	--
TCGA-KIRC	f217a4f9-d8d8-440e-b73a-5f0448b58c4f	TCGA-BP-5187	--	male	1953	white	-19999	alive	--	not reported	--	--	--	not reported	not reported	--	--	--	Clear cell adenocarcinoma, NOS	stage i	19999	M0	--	8310-03-01	--	--	--	--	--	--	--	--	--	--	--	406	--	--	not reported	--	--	Kidney, NOS	not reported	--	--	not reported	--	--	--
TCGA-KIRC	23c7555b-7a37-415d-bda8-3588078a0c2e	TCGA-BP-5189	--	male	1947	white	-22156	dead	822	not hispanic or latino	2009	--	--	not reported	not reported	--	--	--	Clear cell adenocarcinoma, NOS	stage i	22156	M0	--	8310-03-01	--	--	--	--	--	--	--	--	--	--	--	--	--	--	not reported	--	--	Kidney, NOS	not reported	--	--	not reported	--	--	--
TCGA-KIRC	b9fc9eff-1228-482d-87a2-ebbb5c92733a	TCGA-BP-5191	--	male	1928	white	-29207	alive	--	not hispanic or latino	--	--	--	not reported	not reported	--	--	--	Clear cell adenocarcinoma, NOS	stage iii	29207	M0	--	8310-03-01	--	--	--	--	--	--	--	--	--	--	--	967	--	--	not reported	--	--	Kidney, NOS	not reported	--	--	not reported	--	--	--
TCGA-KIRC	d4098753-2e83-42c1-a06b-c03f7700e70c	TCGA-BP-5195	--	male	1933	white	-27547	alive	--	not hispanic or latino	--	--	--	not reported	not reported	--	--	--	Clear cell adenocarcinoma, NOS	stage i	27547	M0	--	8310-03-01	--	--	--	--	--	--	--	--	--	--	--	749	--	--	not reported	--	--	Kidney, NOS	not reported	--	--	not reported	--	--	--
TCGA-KIRC	4c3e4727-77f5-4374-9d83-ec86d61b02b2	TCGA-BP-5196	--	male	1955	white	-19719	alive	--	not reported	--	--	--	not reported	not reported	--	--	--	Clear cell adenocarcinoma, NOS	stage i	19719	M0	--	8310-03-01	--	--	--	--	--	--	--	--	--	--	--	1018	--	--	not reported	--	--	Kidney, NOS	not reported	--	--	not reported	--	--	--
TCGA-KIRC	8f936d84-3b81-4d1c-aca1-93f5c86ed1bc	TCGA-BP-5198	--	male	1936	white	-26360	alive	--	not reported	--	--	--	not reported	not reported	--	--	--	Clear cell adenocarcinoma, NOS	stage iii	26360	M0	--	8310-03-01	--	--	--	--	--	--	--	--	--	--	--	603	--	--	not reported	--	--	Kidney, NOS	not reported	--	--	not reported	--	--	--
TCGA-KIRC	d30f460b-8e85-4eb4-83b8-0a5d8bf4d10d	TCGA-BP-5199	--	male	1948	white	-21256	alive	--	not hispanic or latino	--	--	--	not reported	not reported	--	--	--	Clear cell adenocarcinoma, NOS	stage ii	21256	M0	--	8310-03-01	--	--	--	--	--	--	--	--	--	--	--	1355	--	--	not reported	--	--	Kidney, NOS	not reported	--	--	not reported	--	--	--
TCGA-KIRC	f1ed9155-ea54-4435-8920-0df8ed7febda	TCGA-BP-5200	--	male	1964	white	-16197	alive	--	not reported	--	--	--	not reported	not reported	--	--	--	Clear cell adenocarcinoma, NOS	stage ii	16197	M0	--	8310-03-01	--	--	--	--	--	--	--	--	--	--	--	1063	--	--	not reported	--	--	Kidney, NOS	not reported	--	--	not reported	--	--	--
TCGA-KIRC	54c9850c-9b67-42ea-a04b-16a88f786dfa	TCGA-BP-5201	--	male	1945	white	-23125	alive	--	not hispanic or latino	--	--	--	not reported	not reported	--	--	--	Clear cell adenocarcinoma, NOS	stage iv	23125	M1	--	8310-03-01	--	--	--	--	--	--	--	--	--	--	--	951	--	--	not reported	--	--	Kidney, NOS	not reported	--	--	not reported	--	--	--
TCGA-KIRC	b6d4e2d5-5739-4be3-8a4c-6e7a17d1d40f	TCGA-BP-5202	--	male	1933	white	-27556	alive	--	not reported	--	--	--	not reported	not reported	--	--	--	Clear cell adenocarcinoma, NOS	stage iii	27556	M0	--	8310-03-01	--	--	--	--	--	--	--	--	--	--	--	29	--	--	not reported	--	--	Kidney, NOS	not reported	--	--	not reported	--	--	--
TCGA-KIRC	852effcd-8146-46e1-96fa-e5a9f09a88e2	TCGA-CJ-4634	--	female	1944	white	-22155	alive	--	not hispanic or latino	--	--	--	not reported	not reported	--	--	--	Clear cell adenocarcinoma, NOS	stage i	22155	M0	--	8310-03-01	--	--	--	--	--	--	--	--	--	--	--	3498	--	--	not reported	--	--	Kidney, NOS	not reported	--	--	not reported	--	--	--
TCGA-KIRC	b7719c71-de18-4a4d-99ef-67b788c6f77c	TCGA-CJ-4635	--	male	1956	white	-17620	alive	--	hispanic or latino	--	--	--	not reported	not reported	--	--	--	Clear cell adenocarcinoma, NOS	stage i	17620	M0	--	8310-03-01	--	--	--	--	--	--	--	--	--	--	--	1416	--	--	not reported	--	--	Kidney, NOS	not reported	--	--	not reported	--	--	--
TCGA-KIRC	2d8da564-e69f-4bfa-a1d3-227a294f3886	TCGA-CJ-4636	--	male	1953	white	-18878	alive	--	not hispanic or latino	--	--	--	not reported	not reported	--	--	--	Clear cell adenocarcinoma, NOS	stage iii	18878	M0	--	8310-03-01	--	--	--	--	--	--	--	--	--	--	--	1924	--	--	not reported	--	--	Kidney, NOS	not reported	--	--	not reported	--	--	--
TCGA-KIRC	06197e26-3cb0-4bd0-a6e8-dd9af5047c6a	TCGA-CJ-4638	--	female	1958	white	-17110	dead	431	not hispanic or latino	2005	--	--	not reported	not reported	--	--	--	Clear cell adenocarcinoma, NOS	stage iv	17110	M1	--	8310-03-01	--	--	--	--	--	--	--	--	--	--	--	--	--	--	not reported	--	--	Kidney, NOS	not reported	--	--	not reported	--	--	--
TCGA-KIRC	f11f68ac-5ad2-416b-a0c2-697ac3e9718a	TCGA-CJ-4643	--	female	1938	white	-24477	alive	--	hispanic or latino	--	--	--	not reported	not reported	--	--	--	Clear cell adenocarcinoma, NOS	stage ii	24477	M0	--	8310-03-01	--	--	--	--	--	--	--	--	--	--	--	1793	--	--	not reported	--	--	Kidney, NOS	not reported	--	--	not reported	--	--	--
TCGA-KIRC	53dede5a-4423-4da5-bc1e-e5e98b011e36	TCGA-CJ-4873	--	female	1919	white	-31096	alive	--	not hispanic or latino	--	--	--	not reported	not reported	--	--	--	Clear cell adenocarcinoma, NOS	stage iii	31096	M0	--	8310-03-01	--	--	--	--	--	--	--	--	--	--	--	2259	--	--	not reported	--	--	Kidney, NOS	not reported	--	--	not reported	--	--	--
TCGA-KIRC	804a6159-e381-44ea-8680-43c69d013cef	TCGA-CJ-4874	--	female	1931	white	-26761	alive	--	hispanic or latino	--	--	--	not reported	not reported	--	--	--	Clear cell adenocarcinoma, NOS	stage i	26761	M0	--	8310-03-01	--	--	--	--	--	--	--	--	--	--	--	2283	--	--	not reported	--	--	Kidney, NOS	not reported	--	--	not reported	--	--	--
TCGA-KIRC	818022ea-123e-438d-9671-542f479028f2	TCGA-CJ-4875	--	male	1937	white	-24510	dead	3554	not hispanic or latino	--	--	--	not reported	not reported	--	--	--	Clear cell adenocarcinoma, NOS	stage iv	24510	M1	--	8310-03-01	--	--	--	--	--	--	--	--	--	--	--	2353	--	--	not reported	--	--	Kidney, NOS	not reported	--	--	not reported	--	--	--
TCGA-KIRC	e002c248-0db9-4f94-8590-88dfd6c0c642	TCGA-CJ-4876	--	male	1947	white	-20993	alive	--	hispanic or latino	--	--	--	not reported	not reported	--	--	--	Clear cell adenocarcinoma, NOS	stage ii	20993	M0	--	8310-03-01	--	--	--	--	--	--	--	--	--	--	--	1955	--	--	not reported	--	--	Kidney, NOS	not reported	--	--	not reported	--	--	--
TCGA-KIRC	7ca06dbe-f073-4aee-86ff-a545fad5ea93	TCGA-CJ-4878	--	female	1933	white	-26224	alive	--	hispanic or latino	--	--	--	not reported	not reported	--	--	--	Clear cell adenocarcinoma, NOS	stage iii	26224	M0	--	8310-03-01	--	--	--	--	--	--	--	--	--	--	--	2186	--	--	not reported	--	--	Kidney, NOS	not reported	--	--	not reported	--	--	--
TCGA-KIRC	24c1cf70-bd67-431e-a623-d20f8d3f52b2	TCGA-CJ-4881	--	male	1963	white	-15197	alive	--	not hispanic or latino	--	--	--	not reported	not reported	--	--	--	Clear cell adenocarcinoma, NOS	stage iii	15197	M0	--	8310-03-01	--	--	--	--	--	--	--	--	--	--	--	2014	--	--	not reported	--	--	Kidney, NOS	not reported	--	--	not reported	--	--	--
TCGA-KIRC	3ea341e3-868a-44f5-937f-e6a93b031544	TCGA-CJ-4882	--	male	1948	black or african american	-21074	alive	--	not hispanic or latino	--	--	--	not reported	not reported	--	--	--	Clear cell adenocarcinoma, NOS	stage iii	21074	M0	--	8310-03-01	--	--	--	--	--	--	--	--	--	--	--	1883	--	--	not reported	--	--	Kidney, NOS	not reported	--	--	not reported	--	--	--
TCGA-KIRC	4fd166d4-0b77-4815-ae6a-2165522f8251	TCGA-CJ-4884	--	female	1933	white	-26475	alive	--	not hispanic or latino	--	--	--	not reported	not reported	--	--	--	Clear cell adenocarcinoma, NOS	stage iii	26475	M0	--	8310-03-01	--	--	--	--	--	--	--	--	--	--	--	1759	--	--	not reported	--	--	Kidney, NOS	not reported	--	--	not reported	--	--	--
TCGA-KIRC	c0f7147e-d28b-4358-9219-bb31f3012cff	TCGA-CJ-4886	--	female	1963	white	-15698	alive	--	not hispanic or latino	--	--	--	not reported	not reported	--	--	--	Clear cell adenocarcinoma, NOS	stage i	15698	M0	--	8310-03-01	--	--	--	--	--	--	--	--	--	--	--	1952	--	--	not reported	--	--	Kidney, NOS	not reported	--	--	not reported	--	--	--
TCGA-KIRC	c4bbbcd2-aa18-4b1f-99d4-93279e31d7e7	TCGA-CJ-4887	--	male	1957	white	-17611	dead	932	not hispanic or latino	2007	--	--	not reported	not reported	--	--	--	Clear cell adenocarcinoma, NOS	stage iv	17611	M1	--	8310-03-01	--	--	--	--	--	--	--	--	--	--	--	--	--	--	not reported	--	--	Kidney, NOS	not reported	--	--	not reported	--	--	--
TCGA-KIRC	f2fca062-ca87-4089-916d-49b9ff146797	TCGA-CJ-4888	--	male	1946	white	-21701	dead	1567	not hispanic or latino	2009	--	--	not reported	not reported	--	--	--	Clear cell adenocarcinoma, NOS	stage iv	21701	M1	--	8310-03-01	--	--	--	--	--	--	--	--	--	--	--	--	--	--	not reported	--	--	Kidney, NOS	not reported	--	--	not reported	--	--	--
TCGA-KIRC	f964511a-09ed-4a56-a477-0ab1cf067275	TCGA-CJ-4889	--	female	1942	white	-23051	alive	--	hispanic or latino	--	--	--	not reported	not reported	--	--	--	Clear cell adenocarcinoma, NOS	stage i	23051	M0	--	8310-03-01	--	--	--	--	--	--	--	--	--	--	--	1946	--	--	not reported	--	--	Kidney, NOS	not reported	--	--	not reported	--	--	--
TCGA-KIRC	d232f22d-a3e7-41c8-97e1-205de2b488aa	TCGA-CJ-4891	--	female	1948	white	-21059	dead	819	not hispanic or latino	2007	--	--	not reported	not reported	--	--	--	Clear cell adenocarcinoma, NOS	stage iii	21059	M0	--	8310-03-01	--	--	--	--	--	--	--	--	--	--	--	--	--	--	not reported	--	--	Kidney, NOS	not reported	--	--	not reported	--	--	--
TCGA-KIRC	83444c79-6aa5-4081-9143-2055a360e211	TCGA-CJ-4892	--	female	1940	white	-23764	alive	--	not hispanic or latino	--	--	--	not reported	not reported	--	--	--	Clear cell adenocarcinoma, NOS	stage i	23764	M0	--	8310-03-01	--	--	--	--	--	--	--	--	--	--	--	1521	--	--	not reported	--	--	Kidney, NOS	not reported	--	--	not reported	--	--	--
TCGA-KIRC	d1e4f4c0-08cc-4012-9372-9ab987d80dab	TCGA-CJ-4894	--	male	1947	white	-21524	dead	841	not hispanic or latino	2007	--	--	not reported	not reported	--	--	--	Clear cell adenocarcinoma, NOS	stage iii	21524	M0	--	8310-03-01	--	--	--	--	--	--	--	--	--	--	--	841	--	--	not reported	--	--	Kidney, NOS	not reported	--	--	not reported	--	--	--
TCGA-KIRC	900b5f21-e8fb-4a3f-b8e3-ef098716e508	TCGA-CJ-4899	--	male	1964	asian	-15637	alive	--	not hispanic or latino	--	--	--	not reported	not reported	--	--	--	Clear cell adenocarcinoma, NOS	stage i	15637	M0	--	8310-03-01	--	--	--	--	--	--	--	--	--	--	--	1528	--	--	not reported	--	--	Kidney, NOS	not reported	--	--	not reported	--	--	--
TCGA-KIRC	33cd8b05-2b9b-40dd-97a2-40d02e27ee90	TCGA-CJ-4900	--	female	1937	white	-25508	dead	1714	not hispanic or latino	2010	--	--	not reported	not reported	--	--	--	Clear cell adenocarcinoma, NOS	stage iv	25508	M1	--	8310-03-01	--	--	--	--	--	--	--	--	--	--	--	--	--	--	not reported	--	--	Kidney, NOS	not reported	--	--	not reported	--	--	--
TCGA-KIRC	e45166cb-5150-4961-9e13-6891f02c1606	TCGA-CJ-4901	--	male	1959	white	-17396	alive	--	not hispanic or latino	--	--	--	not reported	not reported	--	--	--	Clear cell adenocarcinoma, NOS	stage iii	17396	M0	--	8310-03-01	--	--	--	--	--	--	--	--	--	--	--	1450	--	--	not reported	--	--	Kidney, NOS	not reported	--	--	not reported	--	--	--
TCGA-KIRC	9fe336a8-08a7-4fe7-bf45-afd6a8eb9c75	TCGA-CJ-4902	--	male	1945	white	-22424	alive	--	not hispanic or latino	--	--	--	not reported	not reported	--	--	--	Clear cell adenocarcinoma, NOS	stage iii	22424	M0	--	8310-03-01	--	--	--	--	--	--	--	--	--	--	--	1520	--	--	not reported	--	--	Kidney, NOS	not reported	--	--	not reported	--	--	--
TCGA-KIRC	692f9978-ada8-43aa-81a1-108464c81609	TCGA-CJ-4903	--	male	1956	white	-18510	alive	--	not hispanic or latino	--	--	--	not reported	not reported	--	--	--	Clear cell adenocarcinoma, NOS	stage i	18510	M0	--	8310-03-01	--	--	--	--	--	--	--	--	--	--	--	1559	--	--	not reported	--	--	Kidney, NOS	not reported	--	--	not reported	--	--	--
TCGA-KIRC	ec3b2a30-fcf6-45ef-bd9d-e6089a237c0f	TCGA-CJ-4904	--	female	1946	white	-22036	alive	--	not hispanic or latino	--	--	--	not reported	not reported	--	--	--	Clear cell adenocarcinoma, NOS	stage iv	22036	M1	--	8310-03-01	--	--	--	--	--	--	--	--	--	--	--	3302	--	--	not reported	--	--	Kidney, NOS	not reported	--	--	not reported	--	--	--
TCGA-KIRC	07f596f7-8227-47d3-8e95-2e0b86f44f2b	TCGA-CJ-4908	--	male	1968	white	-14226	alive	--	not hispanic or latino	--	--	--	not reported	not reported	--	--	--	Clear cell adenocarcinoma, NOS	stage i	14226	M0	--	8310-03-01	--	--	--	--	--	--	--	--	--	--	--	1531	--	--	not reported	--	--	Kidney, NOS	not reported	--	--	not reported	--	--	--
TCGA-KIRC	a8db1341-a7fc-4306-91ad-5caaca5c8a6e	TCGA-CJ-4912	--	male	1945	white	-22623	alive	--	hispanic or latino	--	--	--	not reported	not reported	--	--	--	Clear cell adenocarcinoma, NOS	stage ii	22623	M0	--	8310-03-01	--	--	--	--	--	--	--	--	--	--	--	1657	--	--	not reported	--	--	Kidney, NOS	not reported	--	--	not reported	--	--	--
TCGA-KIRC	4519a839-11ea-4628-b5a7-071833ad16de	TCGA-CJ-4916	--	female	1938	white	-25470	alive	--	not hispanic or latino	--	--	--	not reported	not reported	--	--	--	Clear cell adenocarcinoma, NOS	stage iii	25470	M0	--	8310-03-01	--	--	--	--	--	--	--	--	--	--	--	1373	--	--	not reported	--	--	Kidney, NOS	not reported	--	--	not reported	--	--	--
TCGA-KIRC	73c712fe-54d6-4743-90bb-03313eb9fa77	TCGA-CJ-4920	--	female	1940	white	-23656	dead	139	not hispanic or latino	2004	--	--	not reported	not reported	--	--	--	Clear cell adenocarcinoma, NOS	stage i	23656	M0	--	8310-03-01	--	--	--	--	--	--	--	--	--	--	--	--	--	--	not reported	--	--	Kidney, NOS	not reported	--	--	not reported	--	--	--
TCGA-KIRC	960d1eaf-0b96-488b-b62c-829c024fd4b8	TCGA-CJ-5671	--	male	1953	white	-18954	alive	--	not hispanic or latino	--	--	--	not reported	not reported	--	--	--	Clear cell adenocarcinoma, NOS	stage i	18954	M0	--	8310-03-01	--	--	--	--	--	--	--	--	--	--	--	3987	--	--	not reported	--	--	Kidney, NOS	not reported	--	--	not reported	--	--	--
TCGA-KIRC	eee108d6-bb11-4369-b776-0f524afef6f3	TCGA-CJ-5672	--	male	1920	white	-30900	dead	2190	not hispanic or latino	2010	--	--	not reported	not reported	--	--	--	Clear cell adenocarcinoma, NOS	stage i	30900	M0	--	8310-03-01	--	--	--	--	--	--	--	--	--	--	--	--	--	--	not reported	--	--	Kidney, NOS	not reported	--	--	not reported	--	--	--
TCGA-KIRC	310c31bf-91ce-40b4-99e4-a10242296de9	TCGA-CJ-5676	--	male	1957	white	-17170	alive	--	hispanic or latino	--	--	--	not reported	not reported	--	--	--	Clear cell adenocarcinoma, NOS	stage iii	17170	M0	--	8310-03-01	--	--	--	--	--	--	--	--	--	--	--	4067	--	--	not reported	--	--	Kidney, NOS	not reported	--	--	not reported	--	--	--
TCGA-KIRC	d2664fde-ce3b-45e6-9a23-4a07980f7bac	TCGA-CJ-5677	--	female	1950	white	-19849	dead	782	not hispanic or latino	2006	--	--	not reported	not reported	--	--	--	Clear cell adenocarcinoma, NOS	stage iv	19849	M1	--	8310-03-01	--	--	--	--	--	--	--	--	--	--	--	--	--	--	not reported	--	--	Kidney, NOS	not reported	--	--	not reported	--	--	--
TCGA-KIRC	3fa6c93e-e7fe-402c-9526-c81411aa0920	TCGA-CJ-5679	--	male	1930	white	-26858	dead	679	not hispanic or latino	2004	--	--	not reported	not reported	--	--	--	Clear cell adenocarcinoma, NOS	stage iii	26858	M0	--	8310-03-01	--	--	--	--	--	--	--	--	--	--	--	--	--	--	not reported	--	--	Kidney, NOS	not reported	--	--	not reported	--	--	--
TCGA-KIRC	5db69ebe-38db-4ef3-b825-674b4a6ddaee	TCGA-CJ-5680	--	female	1938	white	-23778	dead	768	not hispanic or latino	2005	--	--	not reported	not reported	--	--	--	Clear cell adenocarcinoma, NOS	stage iv	23778	M1	--	8310-03-01	--	--	--	--	--	--	--	--	--	--	--	--	--	--	not reported	--	--	Kidney, NOS	not reported	--	--	not reported	--	--	--
TCGA-KIRC	9f4cd3b9-50ef-4f85-84b8-acb0b77887d1	TCGA-CJ-5684	--	male	1944	white	-22561	alive	--	not hispanic or latino	--	--	--	not reported	not reported	--	--	--	Clear cell adenocarcinoma, NOS	stage iii	22561	M0	--	8310-03-01	--	--	--	--	--	--	--	--	--	--	--	2231	--	--	not reported	--	--	Kidney, NOS	not reported	--	--	not reported	--	--	--
TCGA-KIRC	0631dc8c-5950-4419-adf2-ec3b1e259fc8	TCGA-CJ-5686	--	female	1946	white	-21836	alive	--	not hispanic or latino	--	--	--	not reported	not reported	--	--	--	Clear cell adenocarcinoma, NOS	stage i	21836	M0	--	8310-03-01	--	--	--	--	--	--	--	--	--	--	--	2038	--	--	not reported	--	--	Kidney, NOS	not reported	--	--	not reported	--	--	--
TCGA-KIRC	2890b330-8ba5-4031-bed5-13e9d1d75af9	TCGA-CJ-6028	--	male	1945	white	-21380	dead	1625	not hispanic or latino	2007	--	--	not reported	not reported	--	--	--	Clear cell adenocarcinoma, NOS	stage iv	21380	M1	--	8310-03-01	--	--	--	--	--	--	--	--	--	--	--	--	--	--	not reported	--	--	Kidney, NOS	not reported	--	--	not reported	--	--	--
TCGA-KIRC	f2b93fbd-5848-46e2-978e-ba84e810e0dc	TCGA-CJ-6031	--	male	1949	white	-19905	alive	--	not hispanic or latino	--	--	--	not reported	not reported	--	--	--	Clear cell adenocarcinoma, NOS	stage i	19905	M0	--	8310-03-01	--	--	--	--	--	--	--	--	--	--	--	1906	--	--	not reported	--	--	Kidney, NOS	not reported	--	--	not reported	--	--	--
TCGA-KIRC	beef6a78-a57c-46f1-8f4e-6899f0ba2c6d	TCGA-CJ-6032	--	female	1941	white	-23310	alive	--	hispanic or latino	--	--	--	not reported	not reported	--	--	--	Clear cell adenocarcinoma, NOS	stage ii	23310	M0	--	8310-03-01	--	--	--	--	--	--	--	--	--	--	--	3639	--	--	not reported	--	--	Kidney, NOS	not reported	--	--	not reported	--	--	--
TCGA-KIRC	0487fc41-386c-4d76-9084-daf959bf5e98	TCGA-CW-5585	--	male	1952	white	-18898	alive	--	not hispanic or latino	--	--	--	not reported	not reported	--	--	--	Clear cell adenocarcinoma, NOS	stage iv	18898	M1	--	8310-03-01	--	--	--	--	--	--	--	--	--	--	--	2609	--	--	not reported	--	--	Kidney, NOS	not reported	--	--	not reported	--	--	--
TCGA-KIRC	58ef1a13-a549-4043-b66c-5327bfcbd2e6	TCGA-CW-5589	--	male	1952	white	-19312	alive	--	not hispanic or latino	--	--	--	not reported	not reported	--	--	--	Clear cell adenocarcinoma, NOS	stage i	19312	M0	--	8310-03-01	--	--	--	--	--	--	--	--	--	--	--	2378	--	--	not reported	--	--	Kidney, NOS	not reported	--	--	not reported	--	--	--
TCGA-KIRC	9fd9104b-a26d-44c7-bb45-f1edd76d0aa0	TCGA-CW-5590	--	male	1953	white	-18905	dead	1075	not hispanic or latino	2006	--	--	not reported	not reported	--	--	--	Clear cell adenocarcinoma, NOS	stage iv	18905	M1	--	8310-03-01	--	--	--	--	--	--	--	--	--	--	--	--	--	--	not reported	--	--	Kidney, NOS	not reported	--	--	not reported	--	--	--
TCGA-KIRC	bbdaa931-e922-49be-bfbf-fa0c2ae27d7a	TCGA-CW-6087	--	male	1942	white	-22438	dead	41	not hispanic or latino	2003	--	--	not reported	not reported	--	--	--	Clear cell adenocarcinoma, NOS	stage iv	22438	M1	--	8310-03-01	--	--	--	--	--	--	--	--	--	--	--	--	--	--	not reported	--	--	Kidney, NOS	not reported	--	--	not reported	--	--	--
TCGA-KIRC	4100b960-7963-4a1e-ba24-0a6526387e06	TCGA-CW-6088	--	male	1943	white	-22020	alive	--	not hispanic or latino	--	--	--	not reported	not reported	--	--	--	Clear cell adenocarcinoma, NOS	stage i	22020	M0	--	8310-03-01	--	--	--	--	--	--	--	--	--	--	--	3222	--	--	not reported	--	--	Kidney, NOS	not reported	--	--	not reported	--	--	--
TCGA-KIRC	4dd51edf-05d1-445a-b43c-6fce29eb21d4	TCGA-CW-6090	--	male	1935	white	-24909	alive	--	not reported	--	--	--	not reported	not reported	--	--	--	Clear cell adenocarcinoma, NOS	stage i	24909	M0	--	8310-03-01	--	--	--	--	--	--	--	--	--	--	--	2552	--	--	not reported	--	--	Kidney, NOS	not reported	--	--	not reported	--	--	--
TCGA-KIRC	5f53ace3-14ca-412a-af6c-98d8996f8177	TCGA-CW-6097	--	male	1972	white	-11701	dead	571	not reported	2005	--	--	not reported	not reported	--	--	--	Clear cell adenocarcinoma, NOS	stage iii	11701	M0	--	8310-03-01	--	--	--	--	--	--	--	--	--	--	--	--	--	--	not reported	--	--	Kidney, NOS	not reported	--	--	not reported	--	--	--
TCGA-KIRC	86f68b7d-30f9-4f01-a9ea-5db1fcd00453	TCGA-CZ-4853	--	male	1923	white	-30191	alive	--	not reported	--	--	--	not reported	not reported	--	--	--	Clear cell adenocarcinoma, NOS	stage i	30191	M0	--	8310-03-01	--	--	--	--	--	--	--	--	--	--	--	774	--	--	not reported	--	--	Kidney, NOS	not reported	--	--	not reported	--	--	--
TCGA-KIRC	fcecafa8-8b8b-4ae6-81bc-73acf05b211a	TCGA-CZ-4856	--	female	1943	white	-22684	alive	--	not hispanic or latino	--	--	--	not reported	not reported	--	--	--	Clear cell adenocarcinoma, NOS	stage i	22684	M0	--	8310-03-01	--	--	--	--	--	--	--	--	--	--	--	18	--	--	not reported	--	--	Kidney, NOS	not reported	--	--	not reported	--	--	--
TCGA-KIRC	d5213422-9447-4f62-b486-3303e3f991fa	TCGA-CZ-4857	--	male	1949	white	-20718	dead	1432	not hispanic or latino	2008	--	--	not reported	not reported	--	--	--	Clear cell adenocarcinoma, NOS	stage iv	20718	M1	--	8310-03-01	--	--	--	--	--	--	--	--	--	--	--	--	--	--	not reported	--	--	Kidney, NOS	not reported	--	--	not reported	--	--	--
TCGA-KIRC	f06bdea2-4528-4a14-9cea-280af6b4c702	TCGA-CZ-4858	--	male	1966	white	-14343	dead	2105	not hispanic or latino	--	--	--	not reported	not reported	--	--	--	Clear cell adenocarcinoma, NOS	stage ii	14343	M0	--	8310-03-01	--	--	--	--	--	--	--	--	--	--	--	1943	--	--	not reported	--	--	Kidney, NOS	not reported	--	--	not reported	--	--	--
TCGA-KIRC	dc43cfe0-8880-419f-946c-c0ad586e57ca	TCGA-CZ-4859	--	female	1946	white	-21842	alive	--	not reported	--	--	--	not reported	not reported	--	--	--	Clear cell adenocarcinoma, NOS	stage i	21842	M0	--	8310-03-01	--	--	--	--	--	--	--	--	--	--	--	1787	--	--	not reported	--	--	Kidney, NOS	not reported	--	--	not reported	--	--	--
TCGA-KIRC	226ce515-c12c-4195-bb5d-d6df2e135ff6	TCGA-CZ-4861	--	male	1942	white	-23053	dead	446	not reported	2006	--	--	not reported	not reported	--	--	--	Clear cell adenocarcinoma, NOS	stage ii	23053	M0	--	8310-03-01	--	--	--	--	--	--	--	--	--	--	--	--	--	--	not reported	--	--	Kidney, NOS	not reported	--	--	not reported	--	--	--
TCGA-KIRC	88e7ce26-5b3f-4e4e-89b7-f706063fc467	TCGA-CZ-4863	--	female	1955	white	-18730	alive	--	not hispanic or latino	--	--	--	not reported	not reported	--	--	--	Clear cell adenocarcinoma, NOS	stage iii	18730	M0	--	8310-03-01	--	--	--	--	--	--	--	--	--	--	--	1928	--	--	not reported	--	--	Kidney, NOS	not reported	--	--	not reported	--	--	--
TCGA-KIRC	7fc6b44d-ae66-409c-98e1-c1a518c33e95	TCGA-CZ-4864	--	male	1916	white	-31557	dead	2830	not hispanic or latino	2009	--	--	not reported	not reported	--	--	--	Clear cell adenocarcinoma, NOS	stage ii	31557	M0	--	8310-03-01	--	--	--	--	--	--	--	--	--	--	--	2830	--	--	not reported	--	--	Kidney, NOS	not reported	--	--	not reported	--	--	--
TCGA-KIRC	305eaef4-4644-46e3-a696-d2e4a972f691	TCGA-CZ-4865	--	female	1936	white	-25709	dead	166	not hispanic or latino	2006	--	--	not reported	not reported	--	--	--	Clear cell adenocarcinoma, NOS	stage i	25709	M0	--	8310-03-01	--	--	--	--	--	--	--	--	--	--	--	--	--	--	not reported	--	--	Kidney, NOS	not reported	--	--	not reported	--	--	--
TCGA-KIRC	577847b9-f9b6-4954-868f-3d5ab2b4f694	TCGA-CZ-5453	--	male	1939	white	-24640	dead	2419	not reported	--	--	--	not reported	not reported	--	--	--	Clear cell adenocarcinoma, NOS	stage ii	24640	M0	--	8310-03-01	--	--	--	--	--	--	--	--	--	--	--	25	--	--	not reported	--	--	Kidney, NOS	not reported	--	--	not reported	--	--	--
TCGA-KIRC	6b0c1e54-b643-4490-927e-d5c91957d5d2	TCGA-CZ-5459	--	male	1943	white	-23318	alive	--	not reported	--	--	--	not reported	not reported	--	--	--	Clear cell adenocarcinoma, NOS	stage iii	23318	M0	--	8310-03-01	--	--	--	--	--	--	--	--	--	--	--	1683	--	--	not reported	--	--	Kidney, NOS	not reported	--	--	not reported	--	--	--
TCGA-KIRC	a7ddd737-714d-423f-8fb5-5a932d014487	TCGA-CZ-5460	--	male	1951	white	-20392	alive	--	not hispanic or latino	--	--	--	not reported	not reported	--	--	--	Clear cell adenocarcinoma, NOS	stage iv	20392	M1	--	8310-03-01	--	--	--	--	--	--	--	--	--	--	--	2873	--	--	not reported	--	--	Kidney, NOS	not reported	--	--	not reported	--	--	--
TCGA-KIRC	e0127e51-43ba-4536-bc9d-004591f9c627	TCGA-CZ-5462	--	male	1924	white	-30659	dead	311	not reported	2007	--	--	not reported	not reported	--	--	--	Clear cell adenocarcinoma, NOS	stage iv	30659	M1	--	8310-03-01	--	--	--	--	--	--	--	--	--	--	--	--	--	--	not reported	--	--	Kidney, NOS	not reported	--	--	not reported	--	--	--
TCGA-KIRC	5e248b21-e69d-4dee-a1e8-029ade80d0eb	TCGA-CZ-5465	--	female	1931	not reported	-27838	dead	2564	not reported	--	--	--	not reported	not reported	--	--	--	Clear cell adenocarcinoma, NOS	stage iii	27838	M0	--	8310-03-01	--	--	--	--	--	--	--	--	--	--	--	1446	--	--	not reported	--	--	Kidney, NOS	not reported	--	--	not reported	--	--	--
TCGA-KIRC	5722df9f-5631-476d-a11b-b3c1e9a40fbf	TCGA-CZ-5466	--	male	1940	not reported	-24669	alive	--	not reported	--	--	--	not reported	not reported	--	--	--	Clear cell adenocarcinoma, NOS	stage iii	24669	M0	--	8310-03-01	--	--	--	--	--	--	--	--	--	--	--	685	--	--	not reported	--	--	Kidney, NOS	not reported	--	--	not reported	--	--	--
TCGA-KIRC	878d1caa-c4d8-4864-888c-310a0c1ee898	TCGA-CZ-5468	--	male	1923	white	-30729	dead	59	not hispanic or latino	2007	--	--	not reported	not reported	--	--	--	Clear cell adenocarcinoma, NOS	stage iv	30729	M1	--	8310-03-01	--	--	--	--	--	--	--	--	--	--	--	59	--	--	not reported	--	--	Kidney, NOS	not reported	--	--	not reported	--	--	--
TCGA-KIRC	99f59583-2728-4c1d-b98c-8fbc3bb0a819	TCGA-CZ-5470	--	female	1936	not reported	-26494	alive	--	not reported	--	--	--	not reported	not reported	--	--	--	Clear cell adenocarcinoma, NOS	stage ii	26494	M0	--	8310-03-01	--	--	--	--	--	--	--	--	--	--	--	386	--	--	not reported	--	--	Kidney, NOS	not reported	--	--	not reported	--	--	--
TCGA-KIRC	ea26d89f-2843-489b-8627-3d5ed0cabc2a	TCGA-CZ-5984	--	male	1954	white	-18775	alive	--	not reported	--	--	--	not reported	not reported	--	--	--	Clear cell adenocarcinoma, NOS	stage i	18775	M0	--	8310-03-01	--	--	--	--	--	--	--	--	--	--	--	2067	--	--	not reported	--	--	Kidney, NOS	not reported	--	--	not reported	--	--	--
TCGA-KIRC	4c474c70-1d72-49e8-a8cc-a4145c5ab607	TCGA-CZ-5985	--	male	1948	white	-21242	alive	--	not hispanic or latino	--	--	--	not reported	not reported	--	--	--	Clear cell adenocarcinoma, NOS	stage ii	21242	M0	--	8310-03-01	--	--	--	--	--	--	--	--	--	--	--	1997	--	--	not reported	--	--	Kidney, NOS	not reported	--	--	not reported	--	--	--
TCGA-KIRC	f6d28a1d-6691-4ac1-8afb-ab0e7dcef867	TCGA-DV-5565	--	male	1948	white	-21642	alive	--	not hispanic or latino	--	--	--	not reported	not reported	--	--	--	Clear cell adenocarcinoma, NOS	stage i	21642	M0	--	8310-03-01	--	--	--	--	--	--	--	--	--	--	--	1329	--	--	not reported	--	--	Kidney, NOS	not reported	--	--	not reported	--	--	--
TCGA-KIRC	aba26e6b-f11c-4ae6-a0d6-85bdd2060e8f	TCGA-DV-5567	--	female	1968	black or african american	-14642	alive	--	not hispanic or latino	--	--	--	not reported	not reported	--	--	--	Clear cell adenocarcinoma, NOS	stage i	14642	M0	--	8310-03-01	--	--	--	--	--	--	--	--	--	--	--	2004	--	--	not reported	--	--	Kidney, NOS	not reported	--	--	not reported	--	--	--
TCGA-KIRC	16559faa-8103-4973-a47d-3435443e8ec1	TCGA-DV-5568	--	male	1983	white	-9714	alive	--	not hispanic or latino	--	--	--	not reported	not reported	--	--	--	Clear cell adenocarcinoma, NOS	stage i	9714	M0	--	8310-03-01	--	--	--	--	--	--	--	--	--	--	--	370	--	--	not reported	--	--	Kidney, NOS	not reported	--	--	not reported	--	--	--
TCGA-KIRC	fc052a9d-0134-46ce-af98-4703b61d63c4	TCGA-DV-5569	--	female	1980	white	-10698	alive	--	not hispanic or latino	--	--	--	not reported	not reported	--	--	--	Clear cell adenocarcinoma, NOS	stage i	10698	M0	--	8310-03-01	--	--	--	--	--	--	--	--	--	--	--	355	--	--	not reported	--	--	Kidney, NOS	not reported	--	--	not reported	--	--	--
TCGA-KIRC	c6454371-1f84-4e8e-8c3a-2eac8380819e	TCGA-DV-5573	--	male	1967	white	-15264	alive	--	not hispanic or latino	--	--	--	not reported	not reported	--	--	--	Clear cell adenocarcinoma, NOS	stage i	15264	M0	--	8310-03-01	--	--	--	--	--	--	--	--	--	--	--	1130	--	--	not reported	--	--	Kidney, NOS	not reported	--	--	not reported	--	--	--
TCGA-KIRC	ea854858-1dad-4b01-8e58-f19e6a7c41a3	TCGA-DV-5574	--	male	1971	white	-13517	alive	--	not hispanic or latino	--	--	--	not reported	not reported	--	--	--	Clear cell adenocarcinoma, NOS	stage i	13517	M0	--	8310-03-01	--	--	--	--	--	--	--	--	--	--	--	2016	--	--	not reported	--	--	Kidney, NOS	not reported	--	--	not reported	--	--	--
TCGA-KIRC	936c217f-f10b-43cf-bb6d-0a74ebec9b13	TCGA-DV-5576	--	female	1953	black or african american	-20310	dead	727	not hispanic or latino	2009	--	--	not reported	not reported	--	--	--	Clear cell adenocarcinoma, NOS	stage i	20310	M0	--	8310-03-01	--	--	--	--	--	--	--	--	--	--	--	--	--	--	not reported	--	--	Kidney, NOS	not reported	--	--	not reported	--	--	--
TCGA-KIRC	ef2d7ef5-cdfc-48c9-b3fe-6eaf3be1106d	TCGA-DV-A4VX	--	male	1949	black or african american	-21670	dead	1626	not hispanic or latino	2012	--	--	not reported	not reported	--	--	--	Clear cell adenocarcinoma, NOS	stage iv	21670	MX	--	8310-03-01	--	--	--	--	--	--	--	--	--	--	--	--	--	--	not reported	--	--	Kidney, NOS	not reported	--	--	not reported	--	--	--
TCGA-KIRC	fef57c51-0858-42fb-b9eb-3727d274a4e1	TCGA-DV-A4VZ	--	male	1954	black or african american	-19560	alive	--	not hispanic or latino	--	--	--	not reported	not reported	--	--	--	Clear cell adenocarcinoma, NOS	stage i	19560	MX	--	8310-03-01	--	--	--	--	--	--	--	--	--	--	--	365	--	--	not reported	--	--	Kidney, NOS	not reported	--	--	not reported	--	--	--
TCGA-KIRC	01277e9d-a35f-45d9-9e60-2e8cd79630a0	TCGA-DV-A4W0	--	male	1953	black or african american	-20101	alive	--	not hispanic or latino	--	--	--	not reported	not reported	--	--	--	Clear cell adenocarcinoma, NOS	stage i	20101	MX	--	8310-03-01	--	--	--	--	--	--	--	--	--	--	--	2470	--	--	not reported	--	--	Kidney, NOS	not reported	--	--	not reported	--	--	--
TCGA-KIRC	2de427e2-b1f3-4915-9750-ab6414edc92e	TCGA-EU-5904	--	female	1962	white	-17468	alive	--	not reported	--	--	--	not reported	not reported	--	--	--	Clear cell adenocarcinoma, NOS	stage i	17468	M0	--	8310-03-01	--	--	--	--	--	--	--	--	--	--	--	551	--	--	not reported	--	--	Kidney, NOS	not reported	--	--	not reported	--	--	--
TCGA-KIRC	4481ca64-d37c-462d-9403-6b3339728e0c	TCGA-EU-5905	--	female	1943	white	-24475	alive	--	not reported	--	--	--	not reported	not reported	--	--	--	Clear cell adenocarcinoma, NOS	stage i	24475	M0	--	8310-03-01	--	--	--	--	--	--	--	--	--	--	--	119	--	--	not reported	--	--	Kidney, NOS	not reported	--	--	not reported	--	--	--
TCGA-KIRC	68a1a23a-e762-440b-859e-2bebb42d0d59	TCGA-EU-5906	--	male	1955	white	-20246	alive	--	not hispanic or latino	--	--	--	not reported	not reported	--	--	--	Clear cell adenocarcinoma, NOS	stage i	20246	M0	--	8310-03-01	--	--	--	--	--	--	--	--	--	--	--	206	--	--	not reported	--	--	Kidney, NOS	not reported	--	--	not reported	--	--	--
TCGA-KIRC	3f0a2571-c088-4735-8152-61f6fd60ac63	TCGA-G6-A5PC	--	female	1958	black or african american	-20029	dead	242	not hispanic or latino	2012	--	--	not reported	not reported	--	--	--	Clear cell adenocarcinoma, NOS	stage iv	20029	M1	--	8310-03-01	--	--	--	--	--	--	--	--	--	--	--	--	--	--	not reported	--	--	Kidney, NOS	not reported	--	--	not reported	--	--	--
TCGA-KIRC	28011111-4a01-4cdc-8d6b-7223fb2c501b	TCGA-G6-A8L6	--	male	1958	black or african american	-20306	dead	313	not hispanic or latino	--	--	--	not reported	not reported	--	--	--	Clear cell adenocarcinoma, NOS	stage iv	20306	MX	--	8310-03-01	--	--	--	--	--	--	--	--	--	--	--	305	--	--	not reported	--	--	Kidney, NOS	not reported	--	--	not reported	--	--	--
TCGA-KIRC	1d37becb-7a1f-4d04-a0d1-bb14192b56f6	TCGA-G6-A8L7	--	female	1927	black or african american	-29883	alive	--	not hispanic or latino	--	--	--	not reported	not reported	--	--	--	Clear cell adenocarcinoma, NOS	stage i	29883	MX	--	8310-03-01	--	--	--	--	--	--	--	--	--	--	--	2133	--	--	not reported	--	--	Kidney, NOS	not reported	--	--	not reported	--	--	--
TCGA-KIRC	6b033bf5-4ad9-419f-9d2c-63e2e8c80066	TCGA-G6-A8L8	--	female	1946	black or african american	-22649	dead	1091	not hispanic or latino	--	--	--	not reported	not reported	--	--	--	Clear cell adenocarcinoma, NOS	stage i	22649	MX	--	8310-03-01	--	--	--	--	--	--	--	--	--	--	--	474	--	--	not reported	--	--	Kidney, NOS	not reported	--	--	not reported	--	--	--
TCGA-KIRC	0df9ec46-d600-4845-9d00-2dc2732c68d1	TCGA-GK-A6C7	--	female	1936	black or african american	-28107	alive	--	not hispanic or latino	--	--	--	not reported	not reported	--	--	--	Renal cell carcinoma, NOS	stage i	28107	MX	--	8312-03-01	--	--	--	--	--	--	--	--	--	--	--	61	--	--	not reported	--	--	Kidney, NOS	not reported	--	--	not reported	--	--	--
TCGA-KIRC	620baefa-db8f-4af9-9101-4b9b252fa73e	TCGA-MM-A564	--	male	1944	black or african american	-24916	alive	--	not hispanic or latino	--	--	--	not reported	not reported	--	--	--	Clear cell adenocarcinoma, NOS	stage ii	24916	MX	--	8310-03-01	--	--	--	--	--	--	--	--	--	--	--	607	--	--	not reported	--	--	Kidney, NOS	not reported	--	--	not reported	--	--	--
TCGA-KIRC	aa2b6825-3352-4d47-a637-48452f4a958b	TCGA-MM-A84U	--	female	1955	black or african american	-21375	alive	--	not hispanic or latino	--	--	--	not reported	not reported	--	--	--	Clear cell adenocarcinoma, NOS	stage i	21375	MX	--	8310-03-01	--	--	--	--	--	--	--	--	--	--	--	700	--	--	not reported	--	--	Kidney, NOS	not reported	--	--	not reported	--	--	--
TCGA-KIRC	b123e7c1-2472-4427-bfeb-79666f971e66	TCGA-MW-A4EC	--	female	1940	black or african american	-26649	alive	--	hispanic or latino	--	--	--	not reported	not reported	--	--	--	Renal cell carcinoma, NOS	stage i	26649	MX	--	8312-03-01	--	--	--	--	--	--	--	--	--	--	--	498	--	--	not reported	--	--	Kidney, NOS	not reported	--	--	not reported	--	--	--
TCGA-KIRC	df1e2e79-0126-4f3a-85e3-36f59be04622	TCGA-T7-A92I	--	female	1966	black or african american	-17331	alive	--	not hispanic or latino	--	--	--	not reported	not reported	--	--	--	Clear cell adenocarcinoma, NOS	stage i	17331	MX	--	8310-03-01	--	--	--	--	--	--	--	--	--	--	--	356	--	--	not reported	--	--	Kidney, NOS	not reported	--	--	not reported	--	--	--
[truncated: 12 more columns]

## Sheet: Survival Data
Table SI.Clinical information of patients from the TCGA-KIRC dataset and corresponding SIRT6 expression (TPM)
submitter_id	tumor_stage	days_to_death/days_to_last_follow_up	SIRT6(TPM)	Death/Live（1/0)
TCGA-3Z-A93Z	stage i	385	0.219013	0
TCGA-6D-AA2E	stage i	362	0.288712	0
TCGA-A3-3307	stage iii	1436	0.720797	0
TCGA-A3-3311	stage i	1191	0.205358	1
TCGA-A3-3316	stage ii	1493	0.371162	0
TCGA-A3-3317	stage ii	1491	0.246786	0
TCGA-A3-3320	stage i	1508	0.873788	0
TCGA-A3-3325	stage i	1170	0.493131	1
TCGA-A3-3328	stage i	1385	0.524835	0
TCGA-A3-3329	stage i	1624	0.12938	0
TCGA-A3-3346	stage i	137	0.252142	1
TCGA-A3-3347	stage iii	1610	0.609487	1
TCGA-A3-3351	stage ii	910	0.536043	0
TCGA-A3-3352	stage iii	561	0.252227	1
TCGA-A3-3357	stage ii	2688	0.176391	0
TCGA-A3-3358	stage i	1307	0.250931	0
TCGA-A3-3359	stage i	2504	0.522176	0
TCGA-A3-3362	stage i	1559	0.167418	0
TCGA-A3-3363	stage ii	319	0.219119	0
TCGA-A3-3365	stage i	873	0.304609	0
TCGA-A3-3367	stage i	2270	0.183716	0
TCGA-A3-3370	stage i	2274	0.0977385	0
TCGA-A3-3372	stage iii	735	0.128769	0
TCGA-A3-3376	stage i	1696	0.301232	1
TCGA-A3-3378	stage i	630	0.470443	0
TCGA-A3-3380	stage i	567	0.32548	0
TCGA-A3-3382	stage i	574	0.34056	0
TCGA-A3-3383	stage i	861	0.152467	0
TCGA-A3-3385	stage i	1993	0.188935	0
TCGA-A3-3387	stage i	617	0.249724	0
TCGA-A3-A6NI	stage i	1018	0.127494	0
TCGA-A3-A6NJ	stage i	468	0.143051	0
TCGA-A3-A6NL	stage i	689	0.358439	0
TCGA-A3-A6NN	stage i	3	0.594276	0
TCGA-A3-A8CQ	stage i	3	0.366437	0
TCGA-A3-A8OW	stage iii	323	0.313588	0
TCGA-AK-3426	stage iii	885	0.134313	1
TCGA-AK-3429	stage ii	3328	0.155273	0
TCGA-AK-3434	stage i	2087	0.312285	0
TCGA-AK-3443	stage ii	1423	0.160479	0
TCGA-AK-3445	stage iii	2392	0.310602	0
TCGA-AK-3450	stage i	1779	0.269843	0
TCGA-AK-3453	stage ii	2531	0.312077	0
TCGA-AK-3455	stage iii	683	0.145624	1
TCGA-AK-3460	stage i	2508	0.170141	0
TCGA-AK-3461	stage i	2217	0.182261	0
TCGA-AK-3465	stage i	369	0.0747896	0
TCGA-AS-3777	stage i	1238	0.0651729	0
TCGA-B0-4688	stage iv	101	0.588037	1
TCGA-B0-4690	stage iv	43	0.259351	1
TCGA-B0-4691	stage iv	139	0.300874	1
TCGA-B0-4696	stage iii	866	1.64207	1
TCGA-B0-4697	stage iv	578	1.21693	1
TCGA-B0-4698	stage iv	42	0.572968	1
TCGA-B0-4699	stage iv	110	0.15569	1
TCGA-B0-4700	stage iv	1980	0.118459	1
TCGA-B0-4701	stage iv	238	0.279803	1
TCGA-B0-4703	stage iv	182	0.151253	1
TCGA-B0-4706	stage iii	65	0.599676	1
TCGA-B0-4710	stage iii	1755	0.398434	0
TCGA-B0-4712	stage iv	1337	0.327023	1
TCGA-B0-4713	stage iii	202	0.385166	1
TCGA-B0-4714	stage iv	99	0.459135	1
TCGA-B0-4718	stage iii	1778	0.15134	0
TCGA-B0-4810	stage iii	478	0.718575	1
TCGA-B0-4811	stage iii	1417	0.277303	1
TCGA-B0-4813	stage iii	18	1.05872	1
TCGA-B0-4814	stage iv	168	0.280605	1
TCGA-B0-4815	stage iii	1588	0.1867	1
TCGA-B0-4816	stage ii	1371	0.285679	1
TCGA-B0-4817	stage iii	1019	0.339242	1
TCGA-B0-4819	stage iv	183	0.902148	1
TCGA-B0-4821	stage iii	1230	1.55055	1
TCGA-B0-4822	stage ii	1111	0.67202	1
TCGA-B0-4824	stage i	1657	0.157558	1
TCGA-B0-4828	stage iv	307	0.273462	1
TCGA-B0-4833	stage i	2386	0.143663	1
TCGA-B0-4837	stage i	1378	0.212436	1
TCGA-B0-4839	stage i	1639	0.0856067	1
TCGA-B0-4841	stage iv	204	0.52844	1
TCGA-B0-4844	stage iv	313	0.289369	1
TCGA-B0-4845	stage iv	1986	0.521404	1
TCGA-B0-4846	stage iv	1200	0.132853	1
TCGA-B0-4847	stage iv	793	0.417091	1
TCGA-B0-4849	stage iii	69	0.355142	1
TCGA-B0-4852	stage ii	1121	0.267229	1
TCGA-B0-4945	stage i	2145	0.300497	1
TCGA-B0-5075	stage iii	637	0.231437	1
TCGA-B0-5077	stage i	1317	0.267625	1
TCGA-B0-5080	stage iv	342	0.130819	1
TCGA-B0-5081	stage iii	362	0.142856	1
TCGA-B0-5084	stage iv	222	0.344483	1
TCGA-B0-5085	stage iii	770	0.229909	1
TCGA-B0-5088	stage i	563	0.579193	1
TCGA-B0-5092	stage iv	459	0.248027	1
TCGA-B0-5095	stage iii	245	0.332248	1
TCGA-B0-5097	stage iii	665	0.143266	0
TCGA-B0-5098	stage i	1584	0.521828	1
TCGA-B0-5099	stage iii	485	0.599732	1
TCGA-B0-5102	stage i	2764	0.193407	1
TCGA-B0-5104	stage i	2752	0.451959	1
TCGA-B0-5106	stage i	1598	0.243656	1
TCGA-B0-5107	stage iv	927	0.121725	1
TCGA-B0-5108	stage iii	1782	0.371823	0
TCGA-B0-5109	stage iii	587	0.117324	1
TCGA-B0-5110	stage i	2009	0.153425	0
TCGA-B0-5113	stage iii	1175	0.250683	0
TCGA-B0-5115	stage iv	1604	0.258165	0
TCGA-B0-5120	stage i	1169	0.525697	0
TCGA-B0-5121	stage i	1485	0.194092	0
TCGA-B0-5399	stage i	1411	0.122252	0
TCGA-B0-5692	stage iii	3944	0.120275	0
TCGA-B0-5693	stage i	4074	0.1562	0
TCGA-B0-5695	stage i	2150	0.112262	0
TCGA-B0-5696	stage iii	2609	0.110431	0
TCGA-B0-5698	stage i	3631	0.102687	0
TCGA-B0-5699	stage i	3841	0.262623	0
TCGA-B0-5701	stage iii	2461	0.355538	0
TCGA-B0-5702	stage i	2172	2.27235	0
TCGA-B0-5703	stage i	2246	0.234939	0
TCGA-B0-5705	stage i	4537	0.108338	0
TCGA-B0-5709	stage iii	3974	0.124516	0
TCGA-B0-5712	stage iv	2722	0.109759	0
TCGA-B0-5812	stage i	3834	0.372081	0
TCGA-B2-3924	stage i	1092	0.259142	0
TCGA-B2-4098	stage i	51	0.123648	1
TCGA-B2-4099	stage i	972	0.130937	0
TCGA-B2-4101	stage ii	648	0.417157	0
TCGA-B2-4102	stage i	952	0.136974	0
TCGA-B2-5633	stage i	963	1.31805	0
TCGA-B2-5636	stage i	919	0.184106	0
TCGA-B2-A4SR	stage ii	507	0.161061	0
TCGA-B4-5378	stage i	175	0.129751	0
TCGA-B4-5832	stage iii	155	0.212916	0
TCGA-B4-5835	stage i	16	0.408253	0
TCGA-B8-4143	stage iv	709	0.59786	1
TCGA-B8-4148	stage i	1520	0.291021	0
TCGA-B8-4151	stage iii	1299	0.297104	0
TCGA-B8-4153	stage iii	762	0.443703	0
TCGA-B8-4154	stage i	1380	0.217342	0
TCGA-B8-4619	stage i	523	0.096154	0
TCGA-B8-4621	stage i	788	0.231548	0
TCGA-B8-4622	stage iv	1525	0.268153	0
TCGA-B8-5162	stage ii	36	0.192683	0
TCGA-B8-5163	stage iii	822	0.097635	0
TCGA-B8-5165	stage i	737	0.112895	0
TCGA-B8-5550	stage iii	1476	0.186805	0
TCGA-B8-5551	stage i	16	0.282114	0
TCGA-B8-5552	stage i	1046	0.259907	0
TCGA-B8-A54F	stage i	519	0.340189	0
TCGA-B8-A54G	stage i	53	0.849126	0
TCGA-B8-A54H	stage ii	256	0.109314	0
TCGA-B8-A54I	stage i	150	0.0964923	0
TCGA-B8-A54K	stage i	469	0.332998	0
TCGA-B8-A7U6	stage i	495	0.615257	0
TCGA-B8-A8YJ	stage i	431	0.185252	0
TCGA-BP-4158	stage i	3377	0.115308	0
TCGA-BP-4159	stage i	2601	0.204497	1
TCGA-BP-4160	stage iii	2881	0.207362	0
TCGA-BP-4161	stage i	2746	0.597578	0
TCGA-BP-4162	stage i	3074	0.478176	0
TCGA-BP-4164	stage iii	992	0.399357	1
TCGA-BP-4165	stage i	3037	0.117814	0
TCGA-BP-4166	stage iii	13	0.114166	0
TCGA-BP-4167	stage iii	2718	0.207397	0
TCGA-BP-4169	stage ii	701	0.204494	1
TCGA-BP-4174	stage ii	1879	0.144235	0
TCGA-BP-4176	stage i	1955	0.234752	0
TCGA-BP-4177	stage i	1670	0.12402	0
TCGA-BP-4325	stage i	2964	0.349445	0
TCGA-BP-4330	stage iii	1888	0.449166	0
TCGA-BP-4331	stage i	2454	0.125967	1
TCGA-BP-4332	stage iii	1133	0.377137	0
TCGA-BP-4334	stage iii	645	0.730689	1
TCGA-BP-4337	stage iii	2	0.317614	1
TCGA-BP-4338	stage i	2859	0.0760657	0
TCGA-BP-4341	stage iii	1589	0.100193	1
TCGA-BP-4342	stage ii	2256	0.329891	1
TCGA-BP-4344	stage i	1666	0.410488	0
TCGA-BP-4345	stage iii	1516	0.327486	0
TCGA-BP-4346	stage iii	1493	0.12284	1
TCGA-BP-4347	stage iii	1367	0.245507	0
TCGA-BP-4349	stage i	372	0.706541	0
TCGA-BP-4351	stage iii	970	0.682742	0
TCGA-BP-4352	stage iv	344	0.188231	1
TCGA-BP-4354	stage iv	1034	0.5936	1
TCGA-BP-4355	stage iii	953	0.359747	1
TCGA-BP-4756	stage i	374	0.0912693	0
TCGA-BP-4758	stage i	2208	0.144128	0
TCGA-BP-4760	stage i	2361	0.293754	0
TCGA-BP-4761	stage iii	182	0.103875	0
TCGA-BP-4762	stage i	1343	0.133636	1
TCGA-BP-4765	stage i	2184	0.342433	0
TCGA-BP-4768	stage i	400	0.198522	0
TCGA-BP-4770	stage iv	329	0.426303	1
TCGA-BP-4771	stage iv	162	0.273023	1
TCGA-BP-4774	stage i	1885	0.528106	0
TCGA-BP-4775	stage i	1843	0.386465	0
TCGA-BP-4776	stage i	411	0.14233	0
TCGA-BP-4777	stage i	1731	0.093032	0
TCGA-BP-4781	stage i	2080	0.134227	0
TCGA-BP-4797	stage iii	1107	0.0873357	0
TCGA-BP-4803	stage iii	204	0.107905	0
TCGA-BP-4804	stage i	1459	0.311225	0
TCGA-BP-4959	stage i	2660	0.159989	0
TCGA-BP-4960	stage ii	2172	0.281053	0
TCGA-BP-4961	stage i	1935	0.206951	0
TCGA-BP-4964	stage i	1862	0.168015	0
TCGA-BP-4968	stage i	1746	0.253831	0
TCGA-BP-4969	stage i	1794	0.24422	0
TCGA-BP-4970	stage iii	433	0.0904566	0
TCGA-BP-4971	stage iii	1487	0.574112	0
TCGA-BP-4973	stage iii	1384	0.0817451	0
TCGA-BP-4974	stage iv	211	0.631256	1
TCGA-BP-4975	stage i	1433	0.156676	0
TCGA-BP-4976	stage i	1632	0.0955983	0
TCGA-BP-4977	stage i	454	0.0821864	0
TCGA-BP-4981	stage iii	1097	0.239514	1
TCGA-BP-4982	stage i	1014	0.105565	0
TCGA-BP-4985	stage iii	952	0.0850743	1
TCGA-BP-4986	stage i	785	0.106682	0
TCGA-BP-4987	stage i	1124	0.110721	0
TCGA-BP-4989	stage iii	118	0.2861	0
TCGA-BP-4991	stage i	1413	0.298926	0
TCGA-BP-4992	stage i	501	0.588155	0
TCGA-BP-4993	stage i	177	0.125137	0
TCGA-BP-4994	stage i	1308	0.0747453	0
TCGA-BP-4995	stage i	1371	0.0780156	0
TCGA-BP-4999	stage i	1266	0.17161	0
TCGA-BP-5000	stage i	563	0.0724411	0
TCGA-BP-5001	stage i	1177	0.848521	0
TCGA-BP-5004	stage i	1126	0.182731	0
TCGA-BP-5006	stage i	840	0.179384	0
TCGA-BP-5007	stage ii	1140	0.306514	0
TCGA-BP-5008	stage i	1071	0.398783	0
TCGA-BP-5009	stage i	1092	0.201245	1
TCGA-BP-5010	stage iii	878	0.0979603	1
TCGA-BP-5169	stage i	193	0.199623	0
TCGA-BP-5175	stage i	932	0.0720045	0
TCGA-BP-5176	stage i	1590	0.0877743	1
TCGA-BP-5182	stage i	1165	0.0998988	0
TCGA-BP-5183	stage iii	1291	0.544291	0
TCGA-BP-5185	stage i	1132	0.162315	0
TCGA-BP-5187	stage i	406	0.412811	0
TCGA-BP-5189	stage i	822	0.16358	1
TCGA-BP-5191	stage iii	967	0.207429	0
TCGA-BP-5195	stage i	749	0.205987	0
TCGA-BP-5196	stage i	1018	0.278773	0
TCGA-BP-5198	stage iii	603	0.104599	0
TCGA-BP-5199	stage ii	1355	0.216562	0
TCGA-BP-5200	stage ii	1063	0.0846809	0
TCGA-BP-5201	stage iv	951	0.26479	0
TCGA-BP-5202	stage iii	29	0.0992027	0
TCGA-CJ-4634	stage i	3498	0.436977	0
TCGA-CJ-4635	stage i	1416	0.341743	0
TCGA-CJ-4636	stage iii	1924	0.624141	0
TCGA-CJ-4638	stage iv	431	0.118766	1
TCGA-CJ-4643	stage ii	1793	0.387262	0
TCGA-CJ-4873	stage iii	2259	0.460752	0
TCGA-CJ-4874	stage i	2283	0.11788	0
TCGA-CJ-4875	stage iv	3554	0.351515	1
TCGA-CJ-4876	stage ii	1955	0.244862	0
TCGA-CJ-4878	stage iii	2186	0.503302	0
TCGA-CJ-4881	stage iii	2014	0.356293	0
TCGA-CJ-4882	stage iii	1883	0.281157	0
TCGA-CJ-4884	stage iii	1759	0.0834303	0
TCGA-CJ-4886	stage i	1952	0.274768	0
TCGA-CJ-4887	stage iv	932	0.412518	1
TCGA-CJ-4888	stage iv	1567	0.0810667	1
TCGA-CJ-4889	stage i	1946	0.11208	0
TCGA-CJ-4891	stage iii	819	0.657949	1
TCGA-CJ-4892	stage i	1521	0.120901	0
TCGA-CJ-4894	stage iii	841	0.466577	1
TCGA-CJ-4899	stage i	1528	0.32709	0
TCGA-CJ-4900	stage iv	1714	0.370179	1
TCGA-CJ-4901	stage iii	1450	0.0914084	0
TCGA-CJ-4902	stage iii	1520	0.0860754	0
TCGA-CJ-4903	stage i	1559	0.256806	0
TCGA-CJ-4904	stage iv	3302	0.188059	0
TCGA-CJ-4908	stage i	1531	0.544099	0
TCGA-CJ-4912	stage ii	1657	0.299879	0
TCGA-CJ-4916	stage iii	1373	0.236935	0
TCGA-CJ-4920	stage i	139	0.132117	1
TCGA-CJ-5671	stage i	3987	0.12508	0
TCGA-CJ-5672	stage i	2190	0.15075	1
TCGA-CJ-5676	stage iii	4067	0.117363	0
TCGA-CJ-5677	stage iv	782	0.277601	1
TCGA-CJ-5679	stage iii	679	0.114862	1
TCGA-CJ-5680	stage iv	768	0.25958	1
TCGA-CJ-5684	stage iii	2231	0.121402	0
TCGA-CJ-5686	stage i	2038	0.10763	0
TCGA-CJ-6028	stage iv	1625	0.292369	1
TCGA-CJ-6031	stage i	1906	0.092313	0
TCGA-CJ-6032	stage ii	3639	0.106901	0
TCGA-CW-5585	stage iv	2609	0.233695	0
TCGA-CW-5589	stage i	2378	0.138744	0
TCGA-CW-5590	stage iv	1075	0.114548	1
TCGA-CW-6087	stage iv	41	0.204862	1
TCGA-CW-6088	stage i	3222	0.12732	0
TCGA-CW-6090	stage i	2552	0.331106	0
TCGA-CW-6097	stage iii	571	0.162115	1
TCGA-CZ-4853	stage i	774	0.161021	0
TCGA-CZ-4856	stage i	18	0.0887688	0
TCGA-CZ-4857	stage iv	1432	0.146241	1
TCGA-CZ-4858	stage ii	2105	0.1592	1
TCGA-CZ-4859	stage i	1787	0.100409	0
TCGA-CZ-4861	stage ii	446	0.104128	1
TCGA-CZ-4863	stage iii	1928	0.120435	0
TCGA-CZ-4864	stage ii	2830	0.197455	1
TCGA-CZ-4865	stage i	166	0.246237	1
TCGA-CZ-5453	stage ii	2419	0.0847116	1
TCGA-CZ-5459	stage iii	1683	0.130321	0
TCGA-CZ-5460	stage iv	2873	0.176398	0
TCGA-CZ-5462	stage iv	311	0.333337	1
TCGA-CZ-5465	stage iii	2564	0.0805629	1
TCGA-CZ-5466	stage iii	685	0.275916	0
TCGA-CZ-5468	stage iv	59	0.215423	1
TCGA-CZ-5470	stage ii	386	0.171117	0
TCGA-CZ-5984	stage i	2067	0.108251	0
TCGA-CZ-5985	stage ii	1997	0.121631	0
TCGA-DV-5565	stage i	1329	0.216602	0
TCGA-DV-5567	stage i	2004	0.135964	0
TCGA-DV-5568	stage i	370	0.234228	0
TCGA-DV-5569	stage i	355	0.125704	0
TCGA-DV-5573	stage i	1130	0.280485	0
TCGA-DV-5574	stage i	2016	0.230107	0
TCGA-DV-5576	stage i	727	0.412155	1
TCGA-DV-A4VX	stage iv	1626	0.285507	1
TCGA-DV-A4VZ	stage i	365	0.402658	0
TCGA-DV-A4W0	stage i	2470	0.153073	0
TCGA-EU-5904	stage i	551	0.135655	0
TCGA-EU-5905	stage i	119	0.238857	0
TCGA-EU-5906	stage i	206	0.105412	0
TCGA-G6-A5PC	stage iv	242	0.227111	1
TCGA-G6-A8L6	stage iv	313	0.374853	1
TCGA-G6-A8L7	stage i	2133	0.831687	0
TCGA-G6-A8L8	stage i	1091	0.441039	1
TCGA-GK-A6C7	stage i	61	0.140428	0
TCGA-MM-A564	stage ii	607	0.126861	0
TCGA-MM-A84U	stage i	700	0.119163	0
TCGA-MW-A4EC	stage i	498	0.143529	0
TCGA-T7-A92I	stage i	356	0.233441	0
